# Supplementary material for: Antibodies Set Boundaries Limiting Microbial Metabolite Penetration and the Resultant Mammalian Host Response
Source: PubMed Central journal article supplement — Immunity. 2018 Sep 18;49(3):545–559.e5. doi: 10.1016/j.immuni.2018.08.004 (PMC6162337; doi:10.1016/j.immuni.2018.08.004), 2018-09-18
Supplement: mmc7.pdf [file mmc7.pdf]

# Immunity

## Antibodies Set Boundaries Limiting Microbial Metabolite Penetration and the Resultant Mammalian Host Response

### Graphical Abstract

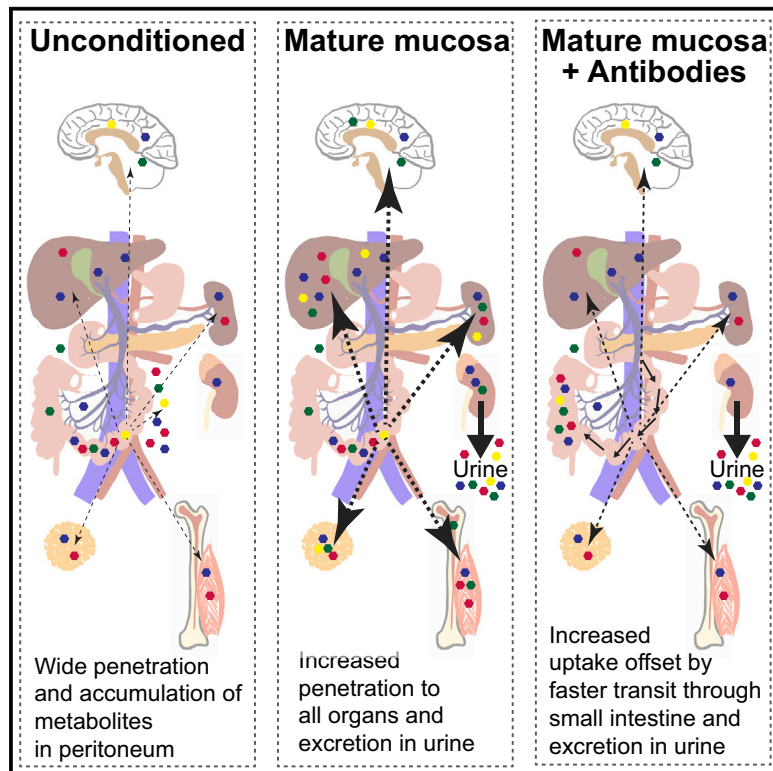

### Authors

Yasuhiro Uchimura, Tobias Fuhrer, Hai Li, ..., Kathy D. McCoy, Uwe Sauer, Andrew J. Macpherson

### Correspondence

sauer@imsb.biol.ethz.ch (U.S.), andrew.macpherson@insel.ch (A.J.M.)

### In Brief

Bacteria-derived metabolites pervade the mammalian host, shaping immunity and metabolism. Using stable isotope tracing, Uchimura and colleagues profile the scope and depth of host tissue penetration by bacterial metabolites. Extensive host immune and metabolic responses to microbial metabolite penetration are constrained by secretory antibodies that limit microbial small-intestinal dwell time.

### Highlights

- Metabolites from mutualistic bacteria broadly penetrate host tissues and organs
- Bacterial metabolites induce widespread host metabolic and immunological responses
- The small intestine is highly susceptible to host-microbial metabolomic exchange
- Secretory immunoglobulins accelerate microbial clearance from the small intestine

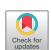

# Antibodies Set Boundaries Limiting Microbial Metabolite Penetration and the Resultant Mammalian Host Response

Yasuhiro Uchimura,<sup>1,4,5</sup> Tobias Fuhrer,<sup>2,5</sup> Hai Li,<sup>1,5</sup> Melissa A. Lawson,<sup>1</sup> Michael Zimmermann,<sup>2</sup> Bahtiyar Yilmaz,<sup>1</sup> Joel Zindel,<sup>1</sup> Francesca Ronchi,<sup>1</sup> Marcel Sorribas,<sup>1</sup> Siegfried Hapfelmeier,<sup>3</sup> Stephanie C. Ganal-Vonarburg,<sup>1</sup> Mercedes Gomez de Agüero,<sup>1</sup> Kathy D. McCoy,<sup>1</sup> Uwe Sauer,<sup>2,5,\*</sup> and Andrew J. Macpherson<sup>1,5,6,\*</sup>

<sup>1</sup>Maurice Müller Laboratories (Department of Biomedical Research), Universitätsklinik für Viszerale Chirurgie und Medizin Inselspital, Murtenstrasse 35, University of Bern, 3008 Bern, Switzerland

<sup>2</sup>Institute of Molecular Systems Biology, Swiss Federal Institute of Technology (ETH) Zürich, Zürich, Switzerland

<sup>3</sup>Institute for Infectious Diseases, University of Bern, Bern, Switzerland

<sup>4</sup>Department of Anatomy and Cell Biology, Shiga University of Medical Science, 520-2192 Shiga, Japan

<sup>5</sup>These authors contributed equally

<sup>6</sup>Lead Contact

\*Correspondence: [sauer@imsb.biol.ethz.ch](mailto:sauer@imsb.biol.ethz.ch) (U.S.), [andrew.macpherson@insel.ch](mailto:andrew.macpherson@insel.ch) (A.J.M.)

<https://doi.org/10.1016/j.immuni.2018.08.004>

## SUMMARY

Although the mammalian microbiota is well contained within the intestine, it profoundly shapes development and metabolism of almost every host organ. We questioned the range and depth of microbial metabolite penetration into the host, and how this is modulated by intestinal immunity. Chemically identical microbial and host metabolites were distinguished by stable isotope tracing from <sup>13</sup>C-labeled live non-replicating *Escherichia coli*, differentiating <sup>12</sup>C host isotopes with high-resolution mass spectrometry. Hundreds of endogenous microbial compounds penetrated 23 host tissues and fluids after intestinal exposure: subsequent <sup>12</sup>C host metabolome signatures included lipidemia, reduced glycolysis, and inflammation. Penetrant bacterial metabolites from the small intestine were rapidly cleared into the urine, whereas induced antibodies curtailed microbial metabolite exposure by accelerating intestinal bacterial transit into the colon where metabolite transport mechanisms are limiting. Pervasive penetration of microbial molecules can cause extensive host tissue responses: these are limited by immune and non-immune intestinal mucosal adaptations to the microbiota.

## INTRODUCTION

The relationship between mammals and their resident microbiota shapes both the microbial communities and every host organ system from conception until death. There are extensive differences in all body systems between animals of the same strain in a germ-free or colonized state (Smith et al., 2007); most effects of the microbiota are seen if a germ-free animal is colonized at

any age, including but not limited to intestinal secretory immunoglobulin (Ig)A induction (Gensollen et al., 2016). Given these ubiquitous interactions over all body systems, it is unsurprising that almost every disease model has been reported to be sensitive to microbial colonization status (Belkaid and Harrison, 2017; Blumberg and Powrie, 2012; Sommer and Bäckhed, 2013).

Since the biomass of the microbiota is well separated from host tissues except during pathogenic infections, at first sight it is paradoxical that the presence of the microbiota shapes the cellular composition and function of non-intestinal mammalian organs so extensively, even when they are almost always sterile. The answer probably lies mainly in the penetration of microbial metabolites, which in some cases have been shown to exert powerful effects on host cell differentiation and metabolism. Microbial metabolite penetration of host tissues was first shown by detecting aromatic compounds in colonized but not germ-free animals more than 40 years ago (Cotran et al., 1960; Dayman and Jepson, 1969). Typically, metabolites are inferred to originate from microbial metabolism when they are present in host tissues only when animals are fully colonized or harbor specific compositions of microbial consortia (El Aidy et al., 2013; Nicholls et al., 2003; Williams et al., 2002). This approach is ambiguous for those compounds that can be synthesized either by host or microbial metabolism, because an increased metabolite concentration after microbial colonization may be due to the propagation from microbes or to the host metabolic response to their presence.

Stable isotope tracing to differentiate microbial or host origins of chemically identical metabolites has so far been used to follow gut microbial metabolism in an *in vitro* model where host effects are eliminated (de Graaf et al., 2010) or to show selective utilization of carbon sources resistant to host digestion by *in vivo* incorporation into microbial RNA of a limited number of species within the intestinal consortia (Tannock et al., 2014). These labeled nutrient supplementation approaches are thus limited to spotlighting the fate of individual nutrients within the microbial communities themselves.

Assessing overall penetration of host tissues with microbial metabolites requires selective labeling of all microbial (but not

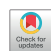

host) molecules, yet avoiding exponential dilution of the label as bacteria use host or nutritional carbon sources to divide *in vivo*. We developed a strategy where germ-free mice are gavaged with a dose of either  $^{12}\text{C}$ - or fully  $^{13}\text{C}$ -labeled live *E. coli* HA107 that cannot replicate in the germ-free intestine (Hapfelmeier et al., 2010), so the  $^{13}\text{C}$ -label is not immediately and exponentially diluted *in vivo* through bacterial replication using host- or food-derived  $^{12}\text{C}$  nutrients. High-resolution mass spectrometry (Fuhrer et al., 2017; Sévin et al., 2017) was then used to reveal both the  $^{13}\text{C}$  host penetration by microbial metabolites and the  $^{12}\text{C}$  host metabolome response to the presence of the microbes in fasting animals. Although *E. coli* is a minor constituent of the adult human microbiota, it is a prominent member of the early life microbiota at a time when diversity is limited (Bäckhed et al., 2015), and thus models some aspects of early-life host-microbial molecular interactions from a low-diversity microbiota.

A second problem in resolving the *in vivo* mechanisms that determine the molecular exchange between intestinal microbes and their mammalian host is that the intestinal mucosa itself is extensively reprogrammed by exposure to intestinal microbes through epithelial cell differentiation, secretion of antibodies, antibacterial polypeptides, microvascular development, and xenobiotic metabolic pathway induction (Gomez de Agüero et al., 2016; Hooper et al., 2001; Macpherson et al., 2000; Stapenbeck et al., 2002; Vaishnava et al., 2011). This means that microbes instruct the very mechanisms that build the dynamic interface separating the host, its intestinal microbes, and their metabolites.  $^{13}\text{C}$ -labeled bacterial challenge of a colonized animal would largely obscure distinction of microbial and host compounds based on the observed isotopes, because of the much larger load of natural  $^{12}\text{C}$  metabolites from the resident microbiota. We have resolved this problem using a system that allows maturation of the intestinal barrier in germ-free animals through transient intestinal live microbial preconditioning without permanent colonization (Hapfelmeier et al., 2010). This approach allowed us to compare microbial-host metabolite exchange directly in fasting germ-free mice, with or without prior microbial-driven mucosal adaptations including Ig induction. The combination of this isotope tracing approach and the transient colonization model has provided a unique insight into how microbial transit through the small intestine and propagation of microbial metabolites throughout the host are checked by secretory and metabolic adaptations of the intestinal mucosa.

## RESULTS

### A Broad Scope of Intestinal Bacterial-Derived Metabolites Penetrates Host Systemic Organs

While a few microbial metabolites, such as short chain fatty acids or aryl hydrocarbon receptor ligands, are well known to shape host metabolism and immune functions (Arpaia et al., 2013; Gomez de Agüero et al., 2016; Perry et al., 2016; Smith et al., 2013b), we do not know the full extent of microbial metabolite penetration, nor the entire scope of consequent host metabolic responses. To assess the propagation of host-microbial mutualism in 16 mouse tissues and 7 fluids systematically, we gavaged fully  $^{13}\text{C}$ -labeled or  $^{12}\text{C}$  live *E. coli* HA107, which cannot replicate *in vivo*, into fasting C57BL/6 germ-free mice (Figure S1A). By employing high-resolution untargeted mass-

spectrometry with high throughput methodology (Fuhrer et al., 2011, 2017; Sévin et al., 2017), we resolved more than 1,000 annotated compounds ( $M_r$  50–1,000 Da at 1 mD resolution) and determined the mass shift showing  $^{13}\text{C}$  or  $^{12}\text{C}$  proportions within each molecule (Figures S1B and S1C). Molecules from fully  $^{13}\text{C}$ -labeled bacteria (Figures S1D and S1E) showed bacterial metabolite exposure (Figures S1B and S1F). However, if the molecule concerned came from the  $^{12}\text{C}$  host response rather than the bacteria (whether or not the challenge bacteria were  $^{13}\text{C}$ -labeled), it gave an appropriate mass/charge ratio signal, but without the  $^{13}\text{C}$  mass shift (Figure S1C, illustrated for a hypothetical  $\text{C}_4$  compound). These experiments can distinguish host and pre-existing endogenous microbial compounds in fasting mice, rather than products of bacterial metabolism from dietary carbon sources.

Two hours after gavage, a wide range of  $^{13}\text{C}$ -labeled bacterial metabolites had already propagated into the host to reach almost all fluids and organs (Figures 1, 2A–2C, and S2A–S2C). However, the distribution of different compound classes varied. Bacterial amino acids (including essential amino acids) penetrated very widely over all host tissues (Figures 1 and S2A). Other bacterial metabolites, including five- and six-membered ring and heterocyclic compounds, were present in the serum and rapidly excreted in the urine (Figures 2B and S2C). Urinary lipid amounts were generally low, consistent with known lipoprotein exclusion from glomerular filtration (Figures 2B and S2B). Bacterial fatty acids and glycerolipids were present mainly in the small intestinal tissue and mesenteric lymph nodes (Figure 2C), consistent with lymphatic uptake. Most compound classes apart from lipids were able to penetrate into the peritoneal fluid of these naive germ-free mice (compare analysis of different compound classes from Figure 2A shown in Figures S2A, S2C, with S2B).

By 18 hr, the front of detected  $^{13}\text{C}$ -labeled metabolites had moved along the intestine to reach the cecum and the colon (compare Figure 2A insets and S2A–S2F insets at 2 and 18 hr), consistent with the known murine intestinal transit times (Padmanabhan et al., 2013). Although bacterial metabolites had been cleared from the small intestinal fluid and peritoneum by 18 hr (Figure S2D–S2F), they were still present in small intestinal tissues (Figure 2C) and being excreted at low amounts in the urine and the bile (Figure 2B). In many cases the bacterial metabolites detected in these unconditioned germ-free mice constituted a high proportion of the total (bacterial+host) concentration for that metabolite across different fluids and tissues of the mouse (Figure S2G).

Since the HA107 system depends on cell wall auxotrophy to abrogate *in vivo* replication, we asked whether increased bacterial fragility of the HA107 system generates increased systemic exposure of bacterial metabolites by comparing penetration of compounds from HA107 or its non-auxotrophic parent strain. For maximum sensitivity, challenge bacteria were labeled by growth in  $^{14}\text{C}$  glucose. Although  $^{14}\text{C}$  metabolic labeling reveals only the bacterial origin of the radiolabel but not the original molecular identity of the bacterial compound, it had the advantage that we could measure overall  $^{14}\text{C}$  transfer, whereas bacterial replication *in vivo* would dilute the proportion of  $^{13}\text{C}$ -label and potential underestimation of penetration. We found overlapping ranges of radiolabel recovery in serum, urine, and host tissues and no significant differences at most time points, regardless

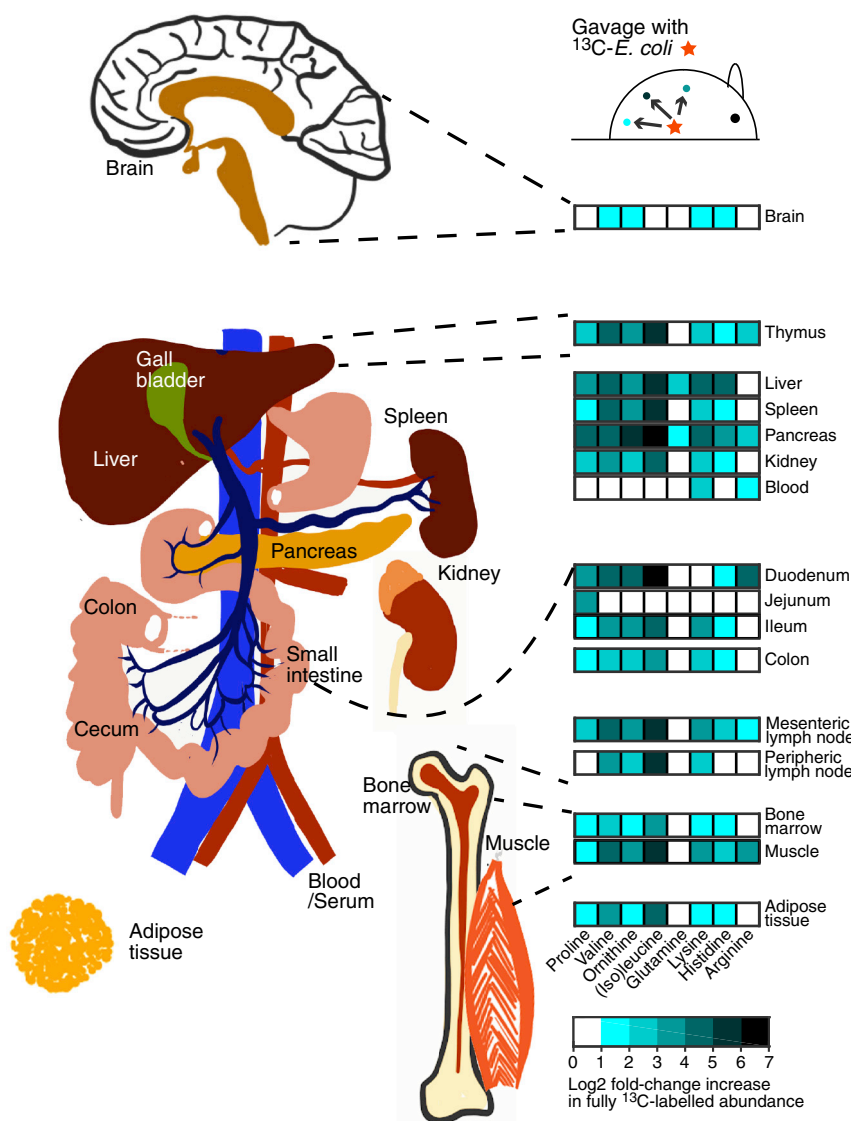

**Figure 1. Depth of Penetration of  $^{13}\text{C}$ -Labeled Bacterial Amino Acids from the Intestine to Systemic Sites of the Body**

Germ-free C57BL/6 mice were gavaged with  $^{13}\text{C}$ - or  $^{12}\text{C}$ -labeled HA107 or PBS as control ( $n = 3\text{--}4$  mice per group). Differential ions detected in different host tissues after 2 hr annotated as fully  $^{13}\text{C}$ -labeled amino acids are indicated where the identical mass did not exhibit any significant change in the  $^{12}\text{C}$  to PBS comparison (positive Log<sub>2</sub>-fold change cutoff of 1 and  $p$  value  $< 0.05$ ). Results are representative of three experiments. See also Figure S1.

We concluded that there is extensive penetration of an extremely broad range of bacterial-derived molecules into host tissues from the germ-free intestine, even though live bacteria penetrate only as far as the local (mesenteric) lymph nodes (Hapfelmeier et al., 2010). These results did not distinguish the relative penetration through the small or large intestinal surfaces, nor show how prior mucosal adaptation of the germ-free intestine through secretory Ig induction, antibacterial peptides, and a consolidated barrier function (Hapfelmeier et al., 2010; Petersson et al., 2011; Salzman et al., 2010; Vaishnavi et al., 2011) could shape microbial-host molecular exchange at both small and large intestinal surfaces.

### The Small Intestine Is the Predominant Interface for Metabolite Penetration of Intestinal Microbes

The small intestine has minimal mucus coverage and is highly adapted for molecular uptake, whereas the large intestine has a thick layer of protective mucus overlying the epithelium (Johansson et al., 2008). We compared uptake of  $^{14}\text{C}$  HA107 after delivery into the stomach or after direct *in vivo* mixing with cecal contents.  $^{14}\text{C}$  labeling was also used in this experiment to detect host exposure to microbial metabolites with maximum sensitivity, even if they underwent secondary metabolism in the host. There was substantial radiolabel uptake from the upper intestine and recovery in the urine, but little uptake from cecal bacteria (Figures 3A, 3B, and S3A–S3C). This verified that the small intestine was the main absorptive surface for extensive microbial molecular exchange with host organ systems, and supported results with the specific molecular  $^{13}\text{C}$  system that the urine is a highly effective immediate elimination route.

The lower small intestine is normally colonized with intestinal microbes, so microbial molecular exposure has potentially important biomedical consequences. Mice are naturally coprophagic, but even adult humans or infants with reduced intestinal motility can have high densities of microbes in the proximal small intestine (Donowitz et al., 2016; Jones et al., 2011). In the

of whether or not the test bacteria were engineered with cell wall auxotrophy (Figures 3A, 3B, and S3A–S3C).

We also confirmed that our method of bacterial gavage into the stomach in buffer did not result in gastric microbial death. A single bacterium of the replication competent parent strain of *E. coli* HA107 was sufficient to permanently colonize the intestine (Figure S3D). Second, direct measurement recovery of a dose of  $1 \times 10^7$  CFU HA107 from the luminal contents and mucosal scrapings of the intestine showed that  $85.6\% \pm 4.4\%$  ( $\bar{x} \pm \text{SD}$ ,  $n = 6$ ) of the gavage dose was present in the small intestine 90 min after administration and  $73.3\% \pm 5.1\%$  from the small intestine and the cecum 150 min after administration. Third, radiolabel penetration from  $^{14}\text{C}$  HA107 or its non-auxotrophic parent strain was equivalent but substantially less than the same dose of  $^{14}\text{C}$  HA107 material that had been lysed by sonication (Figure S3E). Hence there was no evidence for immediate gastric lysis, nor that potential fragility of the employed HA107 strain would liberate more endogenous metabolites than wild-type *E. coli*.

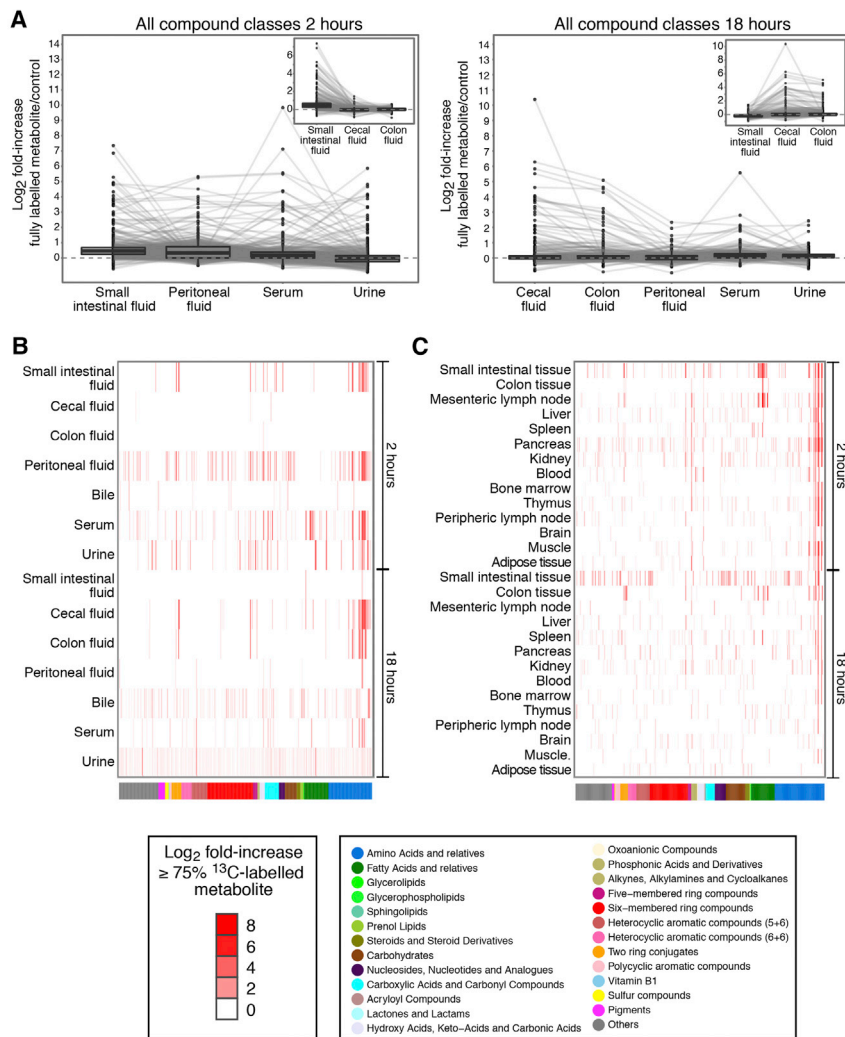

**Figure 2. Penetration of  $^{13}\text{C}$ -Labeled Bacterial Metabolites from the Intestine to Host Tissues and Fluids**

Germ-free C57BL/6 mice were gavaged with  $^{13}\text{C}$ -labeled HA107 or PBS as control ( $n = 3\text{--}4$  mice per group). Fluid samples were collected 2 or 18 hr later and analyzed with Q-TOF mass spectrometry. All ions which were annotated as metabolite isotopes  $\geq 75\%$   $^{13}\text{C}$  labeled are plotted.

(A) Left panel shows samples from small intestinal fluid, peritoneal fluid, serum, and urine at 2 hr; lines connect identical metabolites. Inset shows small intestinal, cecal, and colon fluids also at 2 hr. Right panel shows 18 hr cecal, colon, peritoneal, serum, and urine fluid samples with (inset) small intestinal, cecum, and colon fluids.

(B) Cluster analysis heatmap of all  $^{13}\text{C}$ -labeled annotated metabolites ( $p < 0.05$ ,  $\geq 3$  mice/group) in different host fluids at 2 hr and 18 hr after gavage. Metabolite classes are shown in the lower color bar and legend. Results are representative of three experiments.

(C) As for (B), except  $^{13}\text{C}$ -labeled annotated metabolites in host tissues are shown. See also Figure S2.

developing world, small intestinal microbes cause childhood environmental enteropathy with malnutrition and growth stunting, affecting up to 25% of children aged under 5 years (Korpe and Petri, 2012).

### Maturation of the Intestinal Mucosal Barrier after Transient Live Microbial Exposure Is Durable and Involves Immune and Non-immune Transcriptional Reprogramming

Secretory IgA is known to be induced by small intestinal microbes (Bunker et al., 2015), and environmental enteropathy is associated with compensatory secretory IgA responses against microbes responsible for the loss of intestinal function (Beatty et al., 1983; Kau et al., 2015). We therefore addressed whether antibodies or other barrier functions that are induced as a result of exposure to intestinal microbes constrain microbial metabolite penetration and how this impacts the body metabolome of the host response.

To assess how mucosal protective factors affect bacterial metabolite exchange in the intestine, we needed to experimentally uncouple maturation of the mucosa and its barrier functions from permanent colonization. To confirm the extent of mucosal

adaptations after live reversible *E. coli* HA107 colonization, we carried out transcriptomic analysis of the intestinal mucosa 2 weeks later, once mice had returned to germ-free status (Figure 3C). In line with our earlier results demonstrating a persistent IgA response (Hafelmeier et al., 2010), we found a series of significantly upregulated Ig transcripts 2 weeks after transitory exposure to HA107. In addition, there was upregulation of genes with known functions in xenobiotic and metal

metabolism, mitochondrial function, ion channels, angiogenesis, and epithelial microbiocidal peptide expression (Figures 3C and 3D). In a complementary approach, *in vivo* endomicroscopy was used to compare the endothelial to epithelial ratios in the small intestine of transiently colonized and sham control animals (Figure 3E), consistent with earlier observations of an increased microvascular density induced by permanent colonization with *Bacteroides thetaiotaomicron* (Stappenbeck et al., 2002).

We concluded that even transitory mucosal conditioning by intestinal bacteria results in extensive re-programming of immune, epithelial, and stromal elements of the intestinal mucosa of adult animals that is durable after the mice have returned to germ-free status. Thus, in principle we could evaluate the barriers to microbial molecular penetration through the intestine by comparing secondary bacterial challenge in germ-free mice that had previously been preconditioned by transient colonization with unconditioned germ-free controls.

### Immunoglobulin Induction Accelerates Small Intestinal Transit of Bacteria and Their Metabolites

To determine how mucosal adaptation or antibody induction, or both, affect the depth of metabolite penetration, we compared

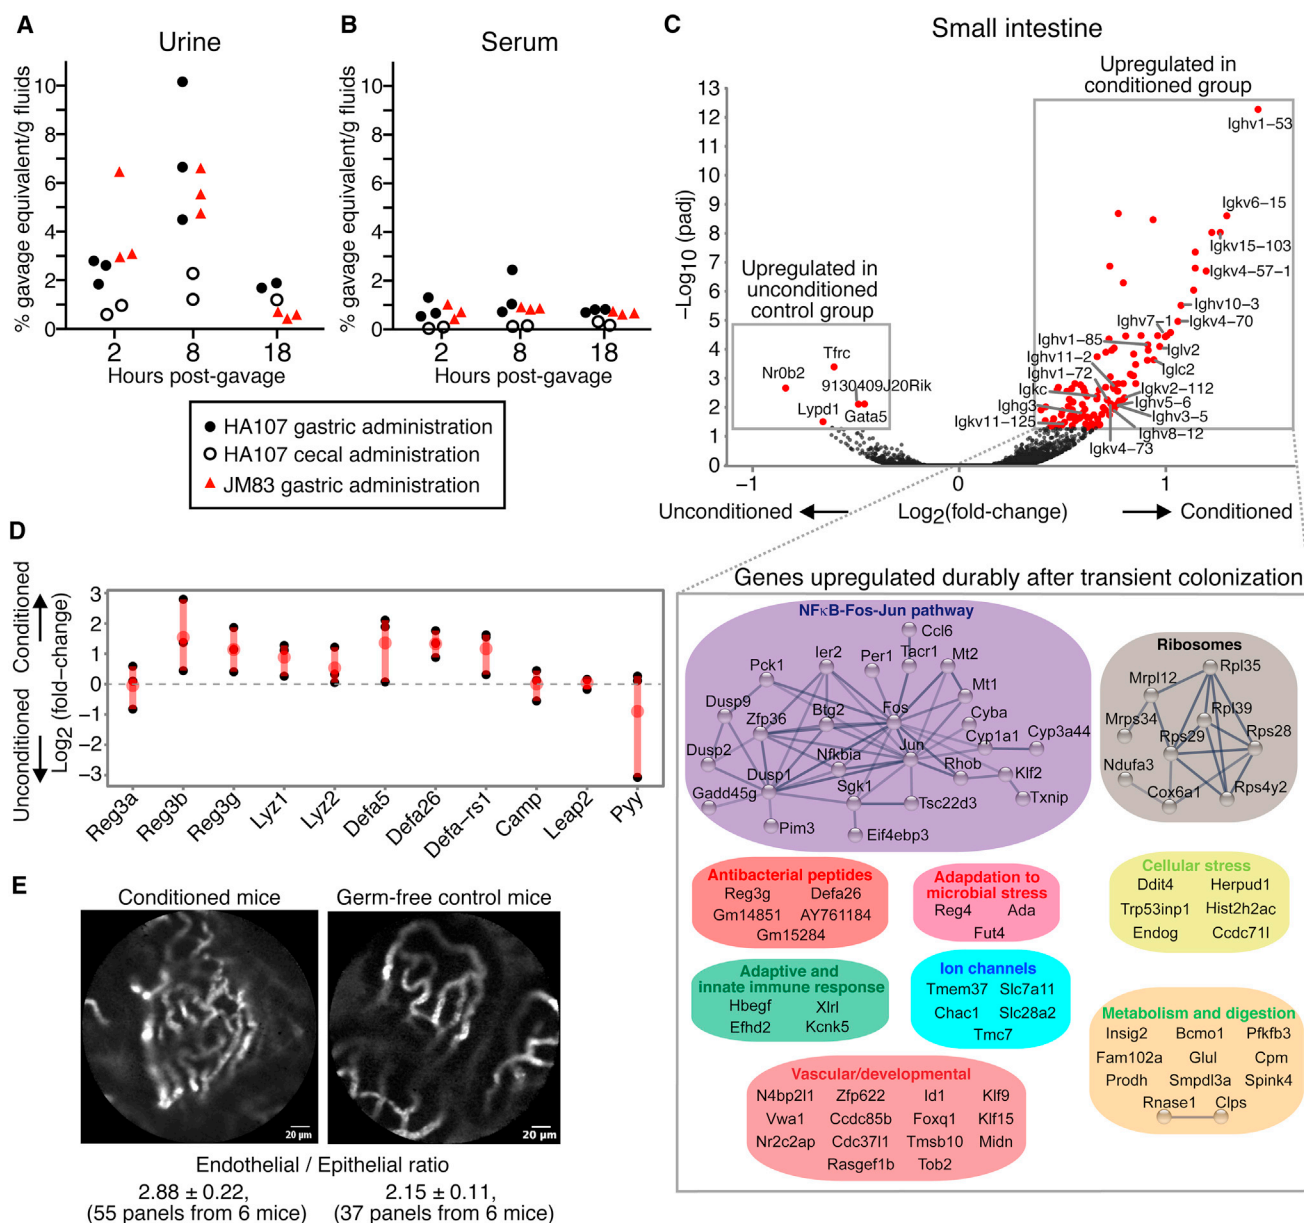

**Figure 3. Kinetics of Metabolite Penetration and Durable Intestinal Conditioning Responses to *E. coli* HA107**

(A and B)  $^{14}\text{C}$ -metabolically labeled *E. coli* HA107 was administered into the stomach (closed circles) or mixed directly with cecal contents (open circles) of germ-free C57BL/6 mice. For comparison,  $^{14}\text{C}$ -labeled *E. coli* JM83 (replication competent parent strain of HA107; red triangles) was administered into the stomach in a separate group.  $^{14}\text{C}$ -radioactivity in the urine (A) or serum (B) at 2, 8, and 18 hr. Results are expressed as a percentage of the gavage dose/g fluid over background. (C) RNA-seq analysis of small intestinal tissue from C57BL/6 germ-free mice primed with HA107 transitory colonization 2 weeks earlier, compared with control germ-free mice. Upper panel: volcano plot shows significantly altered gene expression ( $p_{\text{adj}} < 0.05$ ,  $n \geq 3$ ) in HA107-preconditioned germ-free mice or in sham-treated germ-free mice. Immunoglobulin genes are annotated. Expanded box shows a STRING-DB representation of significantly upregulated non-immunoglobulin genes in preconditioned mice.

(D) Expression of transcripts coding microbiocidal peptides ( $\bar{x} \pm \text{SEM}$ ,  $n \geq 3$ ).

(E) Live intestinal microvascular endomicroscopy imaging. FITC-dextran (70 kD) fluorescence was visualized after i.v. injection into HA107-preconditioned C57BL/6 germ-free and control germ-free mice in the small intestinal villus microvasculature with live Cellvizio endomicroscopy. The  $\bar{x} \pm \text{SEM}$  of endothelial/epithelial ratios of each group ( $n = 6$ ) is indicated (t test  $p < 0.02$ ). Results are representative of six experiments.

See also Figure S3.

germ-free C57BL/6 wild-type with *Igh-J*-deficient mice lacking all antibody isotypes due to deletion of the J-segments of the Ig heavy chain locus (Chen et al., 1993). This avoided the

confounding effects of compensatory intestinal IgM and overinduction of systemic IgG in animals selectively deficient for the IgA isotype (Harriman et al., 1999).

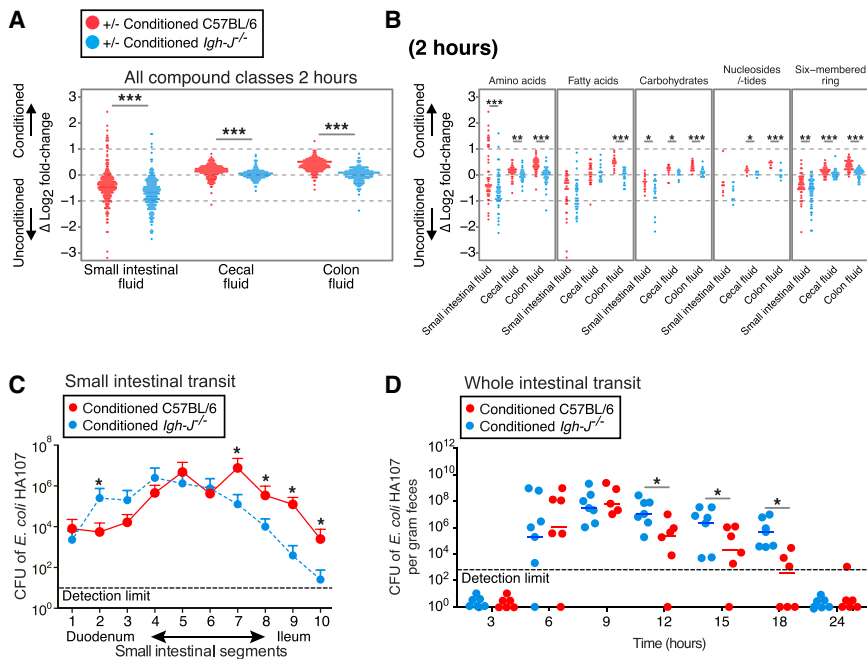

**Figure 4. Transient Intestinal Microbial Conditioning Enhances Clearance of Bacteria and Their Metabolites from the Intestine of C57BL/6 Mice Compared with Antibody-Deficient *Igh-J*<sup>-/-</sup> Mice**

Germ-free C57BL/6 mice (red) or antibody-deficient *Igh-J*<sup>-/-</sup> mice (blue) were preconditioned with HA107 or control treated. Twelve days after all groups had returned to germ-free status, they were gavaged with <sup>13</sup>C-labeled HA107 or PBS as control (n = 3–4 per group) and Log<sub>2</sub> fold-changes were calculated (Figure S1Aii).

(A) Samples from small intestinal, cecal, and colon fluids were collected at 2 hr and analyzed with Q-TOF mass spectrometry. Differences between the Log<sub>2</sub>-fold values of preconditioned and unconditioned mice are shown for ions annotated as metabolite isotopes with ≥ 75% <sup>13</sup>C labeled. Fold-changes based on low abundant ions (counts < 200) were excluded. Mann-Whitney U test; \*\*\*p < 0.001.

(B) As for (A), but the plot shows individual compound classes.

(C) Small intestinal transit of replication-deficient bacteria in wild-type mice and antibody-deficient mice. HA107 preconditioned C57BL/6 mice (red symbols) were compared with HA107

preconditioned antibody-deficient *Igh-J*<sup>-/-</sup> mice (blue) 2 hr after challenging with 10<sup>7</sup> colony forming units (CFU) HA107 delivered into the stomach. The small intestine was divided into 10 sections and CFU in luminal contents of each section were determined with auxotrophic supplements ( $\bar{x} \pm SD$  n = 3, \*p < 0.05).

(D) Whole intestinal transit of replication-deficient bacteria in wild-type mice and antibody-deficient mice. HA107 preconditioned C57BL/6 mice (red symbols) or antibody-deficient *Igh-J*<sup>-/-</sup> mice (blue) were gavaged with 10<sup>9</sup> CFU HA107. Feces were plated with auxotrophic supplements (\*p < 0.05). Results are representative of two experiments with ≥ 6 mice/group.

See also Figure S4.

Groups (≥ 18) of germ-free wild-type C57BL/6 and *Igh-J*<sup>-/-</sup> mice were preconditioned with HA107; separate groups of each strain were treated in parallel with sterile PBS as controls. Preliminary experiments established that <sup>14</sup>C HA107-treated mice had no residual detectable radiolabel 14 days after treatment. Two weeks after the preconditioned HA107-treated mice had returned to germ-free status, they were divided into 3 groups of ≥ 6 animals of each strain to be challenged with a single dose of <sup>13</sup>C- or <sup>12</sup>C-HA107, or sterile PBS, administered directly into the stomach (Figure S1Aii). To investigate how antibodies modulated the effect of preconditioning, we compared the relative difference of positive fold-changes due to propagation of <sup>13</sup>C-labeled compounds between pre- and unconditioned germ-free mice from the C57BL/6 and *Igh-J*<sup>-/-</sup> strains (Figures S1B, S1C, 4A, and 4B).

Two hours after bacterial challenge, conditioned C57BL/6 mice showed increased bacterial metabolites in the cecal fluid and colonic fluid compared with the antibody-deficient *Igh-J*<sup>-/-</sup> strain (p < 0.001 for all measured compounds and for different compound classes considered individually in colonic fluid; Figures 4A and 4B). In contrast, bacterial compounds were enriched in the small intestinal fluid of unconditioned mice compared to conditioned mice (Figure 4A). Since these results were generalized across compound classes, we hypothesized that induced secretory Ig accelerated the transit of intact intestinal bacteria, either through limiting bacterial motility, reducing adherence, or exclusion effects.

We verified in our reversible colonization system that maximum concentrations of secretory IgA directed against in-

testinal bacteria were expressed in the small intestine (Figure S4A; Bunker et al., 2015) and that these IgA antibodies coated the HA107 challenge organisms and their flagella (Figures S4B–S4D).

The hypothesis that induced immunoglobulins directly accelerate the small intestinal transit of intestinal bacteria was confirmed by showing faster small intestinal transit (Figure 4C) and fecal shedding (Figure 4D) of a test dose of HA107 from preconditioned germ-free C57BL/6 mice compared with preconditioned germ-free *Igh-J*<sup>-/-</sup> controls. By 18 hr, most of the load of challenge bacteria had been cleared from the colon of the C57BL/6 wild-type mice. Similar results were obtained comparing pretreated and non-treated control C57BL/6 mice (not shown).

Given that isolated loop experiments had showed no difference in the survival of the bacteria in the intestine whether or not the animals could express antibodies (Figure S4E), we considered whether IgA coating of flagella (Figure S4B, enlarged area) could explain rapid clearance of bacteria from the small intestine. Small intestinal secretions contained anti-flagellin antibodies of the IgA isotype (Figure S4F) and intestinal fluid from preconditioned C57BL/6 but not *Igh-J*-deficient mice attenuated the motility of the bacterial strain (Figure S4G and Videos S1 and S2). Precoating with intestinal fluid from preconditioned C57BL/6 mice, but not *Igh-J*-deficient mice, also limited the bacterial motility in a motility agar assay (Figure S4H), consistent with reported monoclonal anti-flagellin inhibition of bacterial motility (Cullender et al., 2013). While size-exclusion effects or reduced adherence may also contribute to accelerated

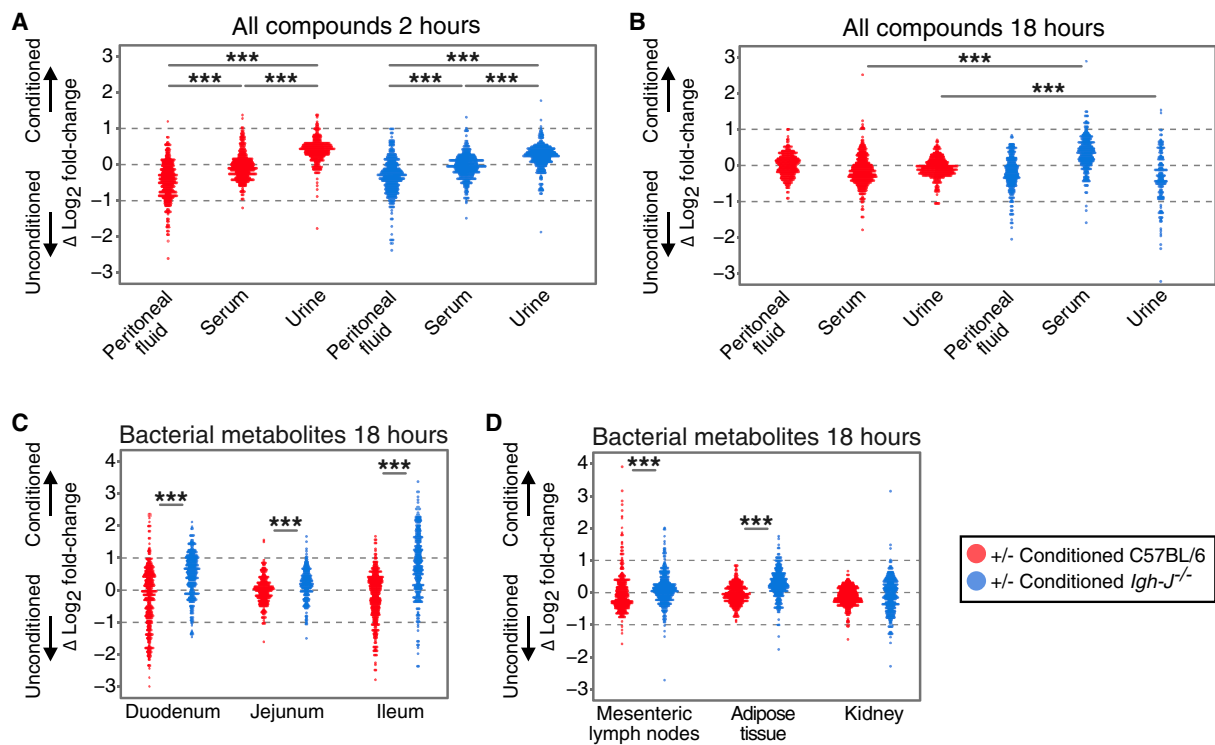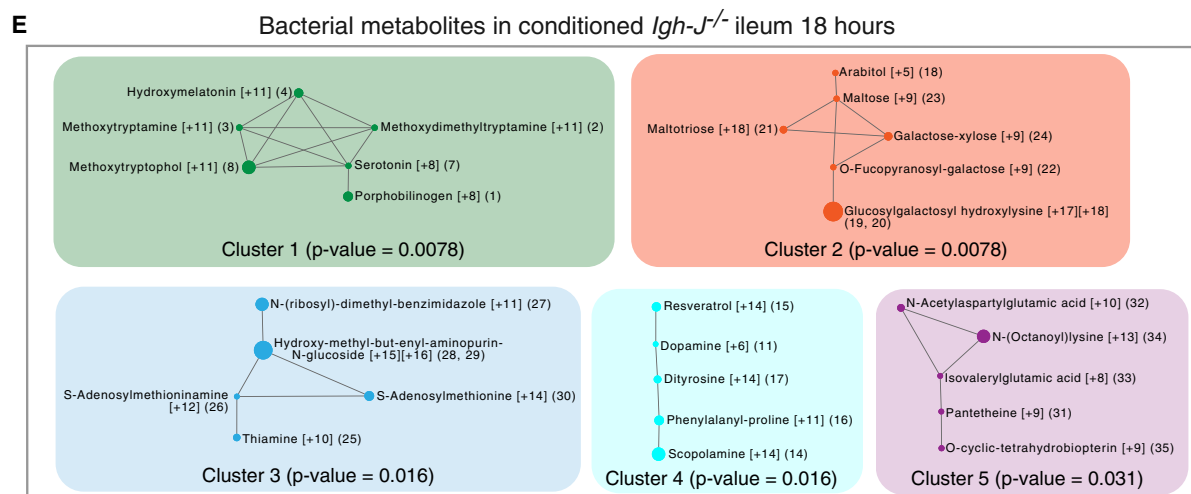

**F** Bacterial metabolites in conditioned *Igh-J<sup>-/-</sup>* blood 18 hours

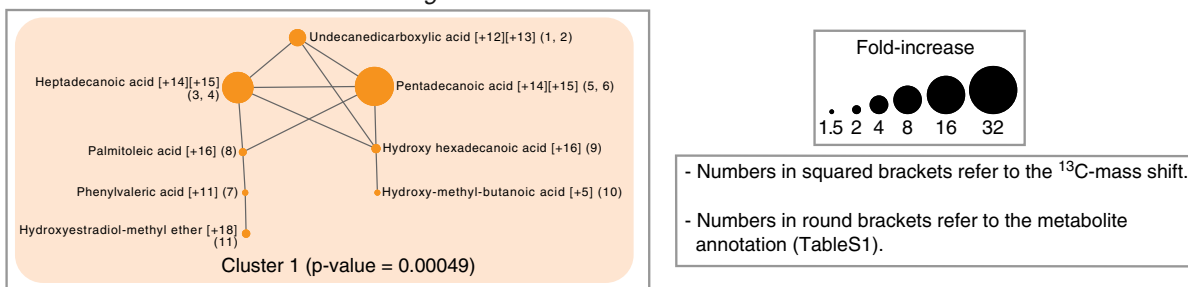

(legend on next page)



antibody-dependent clearance from the small intestine, increased bacterial motility in the absence of secreted small intestinal antibodies potentially allows bacteria to move against the flow of small intestinal secretions, and hence increases exposure of the host to their small intestinal metabolites.

### Non-immune Mechanisms of Prior Intestinal Conditioning with Live Microbes Determine the Bodily Distribution and Excretion of Microbial Metabolites

So far, we had found that without conditioning  $^{13}\text{C}$  bacterial metabolites appear in the peritoneal fluid of C57BL/6 and antibody-deficient mice early after the bacterial challenge (Figures 2A, 2B, S2A–S2C, 5A, and S5A). However, instead of accumulation in the peritoneum, there was preferential elimination in the urine after preconditioning: this effect was antibody independent as it was seen in both wild-type and antibody-deficient animals (Figure 5A). At later times there was persistent uptake of bacterial molecules from the intestine into the serum of conditioned antibody-deficient mice (Figure 5B), reflecting the increased dwell time of bacteria in the small intestine (Figures 4C and 4D). Since metabolites were very effectively filtered into and concentrated within the urine, and the lower serum concentrations remain constant until at least 18 hr (compare Figures 3A and 3B), we concluded that the general preconditioning response improved early clearance of metabolites into the urine. Increased cardiac output and peripheral perfusion have been observed by comparing germ-free and colonized mice (Smith et al., 2007), and bacterial pre-conditioning also increases intestinal microvascular density (Figure 3E) which likely favors early metabolite uptake through the intestinal microvasculature and rapid clearance into the urine as an antibody-independent effect (Figure 5A).

From the results showing increased dwell time of bacteria in the small intestine of antibody-deficient mice, we expected to detect increased bacterial metabolites in intestinal tissues. This was found in the small intestine, mesenteric lymph nodes, and some systemic tissues (Figures 5C and 5D). Specifically, we found that these bacterial metabolites in the ileum of conditioned antibody-deficient mice included potentially inflammatory biogenic amine indole derivatives such as methoxytryptamine, methoxytryptophol, methoxydimethyltryptamine, and serotonin (Figure 5E). In some cases, there was evidence of  $^{12}\text{C}$  incorporation into the dominantly  $^{13}\text{C}$ -labeled metabolites (Table S1 specifies molecular mass-shift results from Figure 5E), indicating formation after additional host or bacterial metabolism *in vivo*. There was also evidence of bacterial saccharides such as arabi-

tol and galactose-xylose normally associated with bacterial but not host metabolism (Figure 5E). The serum of conditioned antibody-deficient mice contained increased bacterial non-esterified fatty acids, most of which were fully  $^{13}\text{C}$ -labeled (Figure 5F and Table S1). Increased lipid exposure as a function of colonization was verified in permanently colonized chow-fed animals (Figure S5B). It is therefore likely that the bacterial lipid load makes a substantial contribution to host lipids, particularly in the context of defective intestinal barrier function.

### Natural Antibodies Binding to Microbial Metabolites Are Induced by Transient Colonization of Germ-free Mice

Given that we had shown binding of induced IgA against the HA107 transient colonizer, we also addressed whether binding to any of its bacterial metabolites could be detected. Using pure compounds selected from the results of the  $^{13}\text{C}$  mass spectrometric identifications, we carried out ELISA binding studies comparing intestinal IgA from C57BL/6 mice and antibody-deficient controls, with and without prior transient colonization. This showed antibody binding against identified authentic metabolites (Figures 5E and 5F), including heptadecanoic acid, pentadecanoic acid, scopolamine, and N-acetylaspartylglutamic acid, with *E. coli* DNA as positive control and maltose as negative control (Figure S5C). These are likely amplified natural specificities (Bunker et al., 2017) as the binding curves of germ-free and transiently colonized mice superimposed when corrected for IgA concentration (Figure S5C insets). Nevertheless, natural IgA per se was insufficient to block the responsiveness of the mucosa independently of small intestinal bacterial clearance. Cytokine secretion induced in ileal explants by the presence of bacteria was affected neither by specific IgA added to the explant system, nor when the explants themselves were from animals expressing mucosal IgA (Figure S5D). We concluded that the principal effect of antibody induction on metabolite exposure is to reduce the bacterial dwell time of the source microbe, rather than preventing adherence or access of the released metabolites to the intestinal mucosa.

### Persisting Exposure of Antibody-Deficient Mice to Bacterial Metabolites Results in Increased Host Cytokine and Metabolomic Responses

Given the pervasive penetration of bacterial-derived metabolites in many different host tissues in antibody-deficient animals, including inflammatory triggers such as biogenic amines and lipids (Figures 5B and 5C), a metabolic and immune host response was expected. To address this in molecular terms,

#### Figure 5. Transient Intestinal Microbial Conditioning Enhances Antibody-Independent Early Clearance of Bacterial Metabolites into the Urine

Germ-free C57BL/6 mice (red symbols) or antibody-deficient *Igh-J<sup>-/-</sup>* mice (blue) were preconditioned with HA107 or control-treated, returning to germ-free status 12 days prior to re-challenge with a gastric dose of fully  $^{13}\text{C}$ -labeled or  $^{12}\text{C}$ - HA107 as in the Figure 4 legend.

(A and B) Log<sub>2</sub> fold differences between HA107-preconditioned and unconditioned germ-free mice for individual annotated ions representing metabolites containing  $\geq 75\%$   $^{13}\text{C}$  are shown for peritoneal fluid, serum, or urine 2 hr (A) or 18 hr (B) after challenge.

(C and D) As for (B) but showing persistent bacterial metabolites in intestinal (C) or systemic (D) tissues of antibody-deficient mice at 18 hr.

(E) Pairwise Tanimoto chemical similarity indices of more than 1.5-fold increased bacterial metabolites ( $\geq 75\%$   $^{13}\text{C}$ ) in ileal tissues at 18 hr of conditioned antibody-deficient mice. Numbers in squared brackets show mass shifts of each metabolite and in round brackets denote chemical annotations for each metabolite in Table S1. Metabolites with Tanimoto chemical similarity  $\geq 0.7$  are interconnected and node size shows fold-increase. The paired Mann-Whitney U test was applied to calculate the p value of each network.

(F) As (E), except analysis of blood metabolite networks. Results are representative of three experiments.

See also Figure S5.

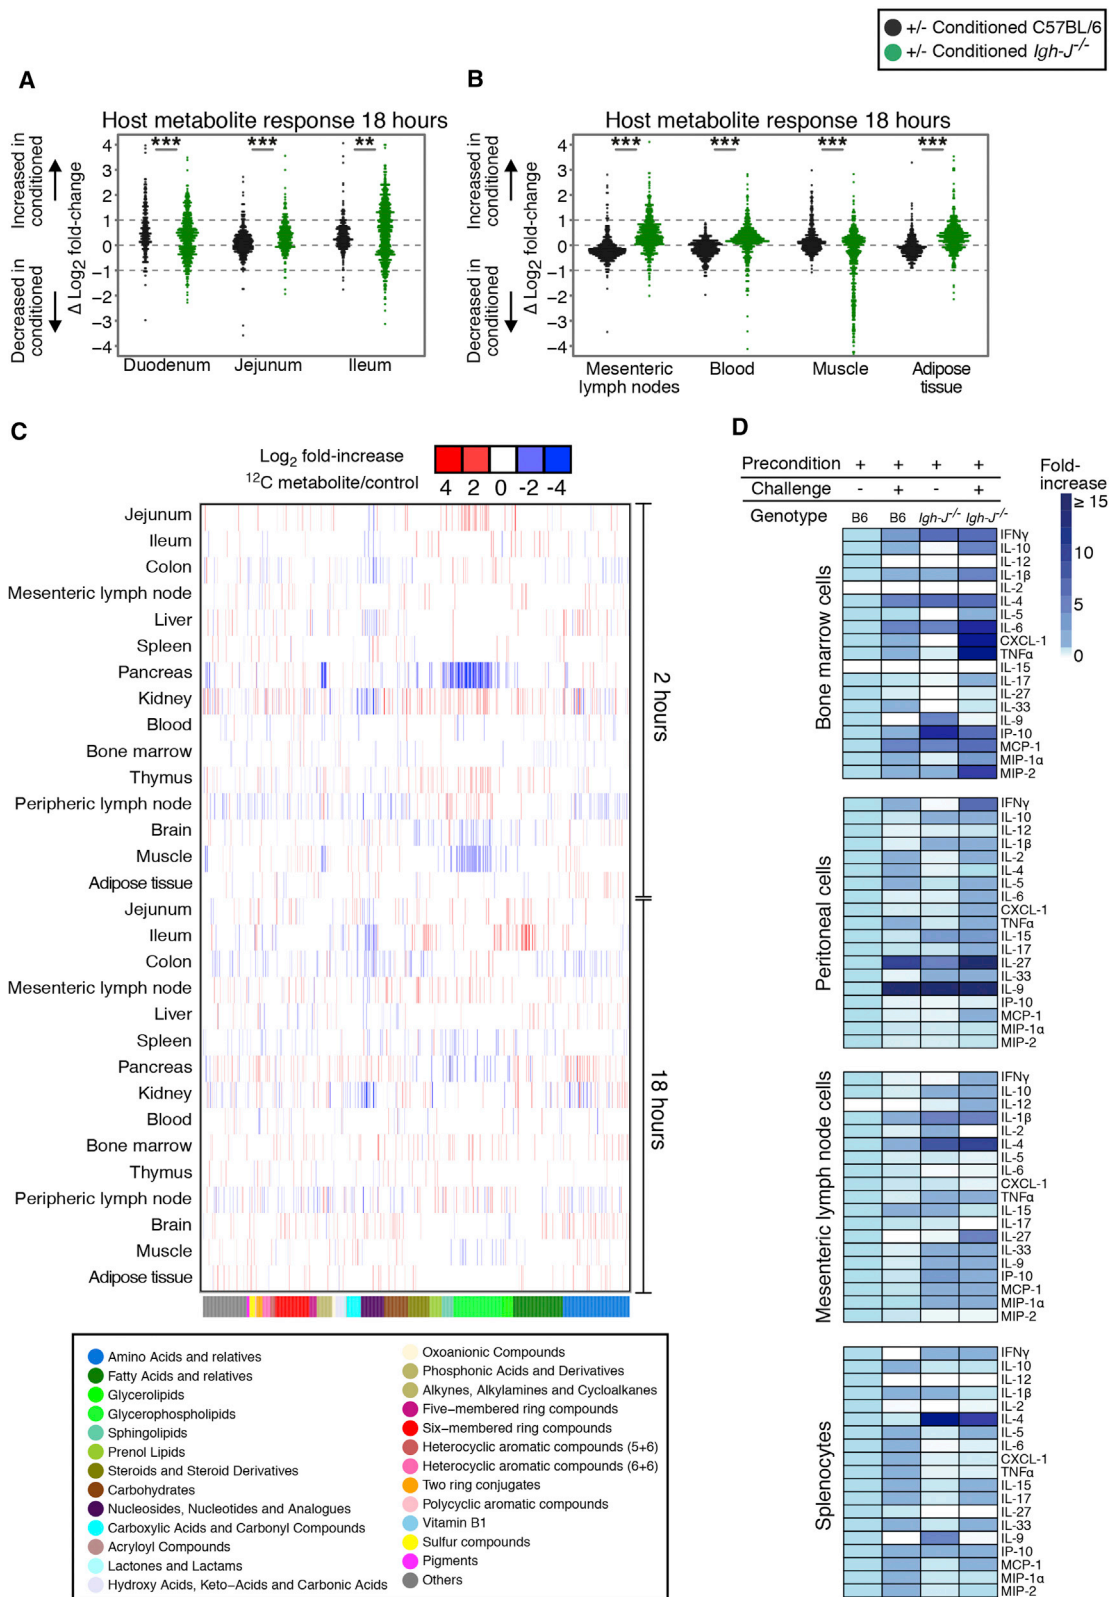

(legend on next page)

we exploited the discrimination power of the stable isotope tracing system by analyzing the changes in  $^{12}\text{C}$  metabolite amounts across different host tissues that were independent of whether a  $^{13}\text{C}$  or  $^{12}\text{C}$  bacterial challenge dose had been given (Figure S1C).

Tissue  $^{12}\text{C}$ -metabolite measurements 18 hr after a transient dose of either  $^{13}\text{C}$ -labeled or  $^{12}\text{C}$  HA107 showed both increases and loss of different specific metabolites in intestinal and systemic tissues of conditioned antibody-deficient compared with wild-type mice (Figures 6A–6C).

The hypothesis that antibody-dependent clearance of bacteria from the small intestine as a mechanism of limiting microbial metabolite exposure predicted that resulting immune responses would also be attenuated *in vivo*. Leukocyte cytokine release from different immune compartments in preconditioned wild-type and antibody-deficient mice showed that bacterial rechallenge generated inflammatory and non-inflammatory cytokine release and that this effect was generally less in conditioned C57BL/6 wild-type than in antibody-deficient mice (Figure 6D). Direct stimulation of leukocyte preparations with pure compounds that had been identified earlier as being of bacterial origin (Figures 5E and 5F) reproduced similar cytokine responses (Table S2). These results verify clear immunostimulatory effects from the penetration of the identified bacterial metabolites and that the functional consequences of exposure are limited by antibody secretion.

As many of the compounds shown by their mass spectrometric signatures to be of host response origin in the *in vivo* experiments are not annotated in metabolic pathways, we used chemical similarity clustering analysis. For example, in antibody-deficient ileal tissues, the Tanimoto network of  $\geq 2$ -fold changes comparing HA107-challenged *Igh-J<sup>-/-</sup>* antibody-deficient mice with unchallenged *Igh-J<sup>-/-</sup>* controls showed increased host lysophospholipids, phosphatidic acids, and non-esterified fatty acids with free head-groups such as arachidonic acid (Figure 7A, Table S3). Increased arachidonic acid-derived host prostaglandins and leukotrienes including leukotriene E3 and prostaglandins A4, E2, F1a, and F2a were consistent with innate immune activation (Figures S6A and 7A).

Increased prostaglandins and leukotrienes were also seen in the pancreas of conditioned antibody-deficient mice at 18 hr, following likely phospholipid breakdown (Figures 6C, S6A, and 7B). In the blood of antibody-deficient mice, there were also increased host non-esterified fatty acids, as well as glycinated fatty acids (Figure 7C), normally associated with lipid overload and deficient mitochondrial metabolism (Vianey-Liaud et al.,

1987). Therefore the lipidemia as a result of bacterial exposure in fasting mice is (1) of both bacterial and host origin and (2) can be triggered by antibody-unprotected exposure of the host to bacterial metabolites in the small intestine.

In contrast, the muscle and the spleen of antibody-deficient animals showed a loss of esterified and non-esterified lipids and increased saccharide intermediates (Figures S6B, S7A, and S7B, Table S3). Fat tissue also showed accumulation of saccharide intermediates under these conditions (Figure S7C). These results are consistent with the established effects of lipotoxicity on lipid and carbohydrate metabolism triggered by circulating non-esterified fatty acids and eicosanoid signaling (Ertunc and Hotamisligil, 2016).

To verify the protective importance of the antibody effect on small intestinal dwell time, we bypassed the effects of microbial conditioning of the intestinal mucosa and antibody control of bacterial transit by direct intraperitoneal injection of identified pure bacterial metabolites. This showed that there were clear responses in different lymphoid compartments, but these no longer consistently differed according to whether or not the mice secrete antibodies, or whether the intestinal mucosa had been preconditioned (Figure S6C and Table S2).

## DISCUSSION

The intestinal microbiota is commonly characterized in terms of its composition of different taxa: host responses or a disease phenotype are then correlated with specific taxa or a restricted range of microbial metabolites. Here we have presented a systematic analysis of the potential extent and reach of microbial-host molecular cross-talk from pre-formed endogenous microbial molecules and show that the microbiota itself induces immune and non-immune boundaries for microbial-host metabolite penetration. A few microbial taxa, such as segmented filamentous bacteria, deliver direct signaling through intimate apposition or attachment to the epithelial surface. Yet most of the microbial biomass exists in a highly dynamic system with constant microbial division and death, in the context of continuous transverse and longitudinal flow along the gastrointestinal tract.

Substantial rates of bacterial cell death have been described under steady-state colonization conditions (Maurice et al., 2013). We did not find evidence that the cell wall auxotrophy of HA107 increased the fragility of the organism compared with its non-auxotrophic parent strain, and we could recover viable bacteria from fecal samples. Although challenge HA107 bacteria

### Figure 6. Exaggerated Host Metabolite Responses in Antibody-Deficient Mice after Microbial Challenge

Germ-free C57BL/6 mice (black symbols) or antibody-deficient *Igh-J<sup>-/-</sup>* mice (green) were preconditioned with HA107 or control treated, returning to germ-free status 12 days prior to re-challenge with a gastric dose of fully  $^{13}\text{C}$ -labeled or  $^{12}\text{C}$  HA107. Tissue samples were collected after 18 hr for Q-TOF mass spectrometry. Annotated ions representing metabolites containing concordant changes from  $^{13}\text{C}$  and  $^{12}\text{C}$  pulsed mice without mass shift were plotted.

(A and B)  $\text{Log}_2$  fold-change differences between preconditioned and control mice for each metabolite is shown for (A) duodenal, jejunal, and ileal tissues; (B) mesenteric lymph nodes, blood, muscle, and adipose tissues.

(C) Heatmap showing cluster analysis of concordant increases (red) or losses (blue) of  $^{12}\text{C}$ -host annotated metabolites ( $p < 0.05$ ,  $\geq 3$  mice/group) where the identical metabolite change was seen without a mass shift in both  $^{13}\text{C}$ - and  $^{12}\text{C}$ -HA107 challenged antibody-deficient mice. Lower color bar and legend shows metabolite classes. Results are representative of two experiments.

(D) Preconditioned germ-free C57BL/6 mice or antibody-deficient *Igh-J<sup>-/-</sup>* mice were either re-challenged with a gastric dose of  $10^{10}$  HA107 or left untreated. Total cells isolated from different lymphoid tissues were cultured for 2 hr prior to supernatant cytokine analysis. Results are calculated from two independent experiments with 3–4 mice/group.

See also Figures S6 and S7.

### A Host metabolite response increased in conditioned *Igh-J<sup>-/-</sup>* ileum tissue 18 hours

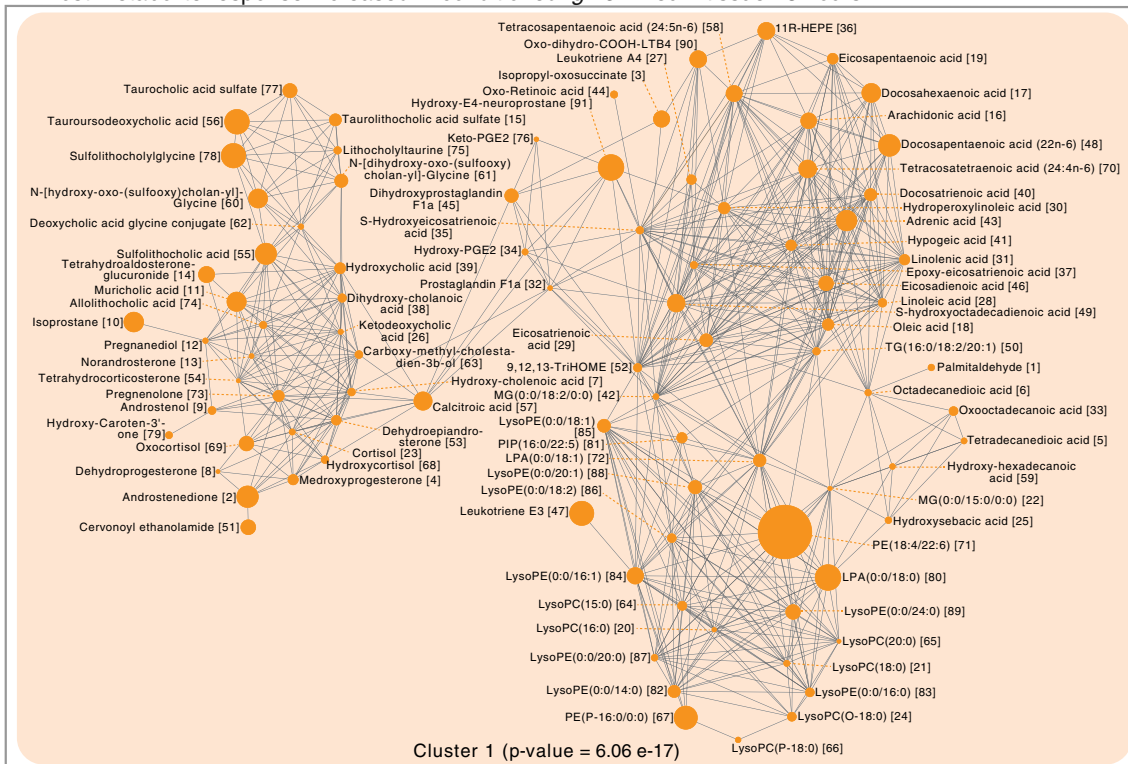

### B Host metabolite response increased in conditioned *Igh-J<sup>-/-</sup>* pancreas 18 hours

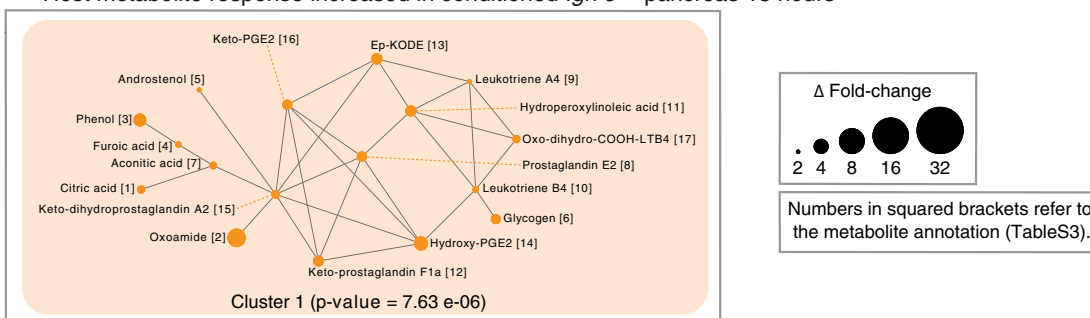

### C Host metabolite response increased in conditioned *Igh-J<sup>-/-</sup>* blood 18 hours

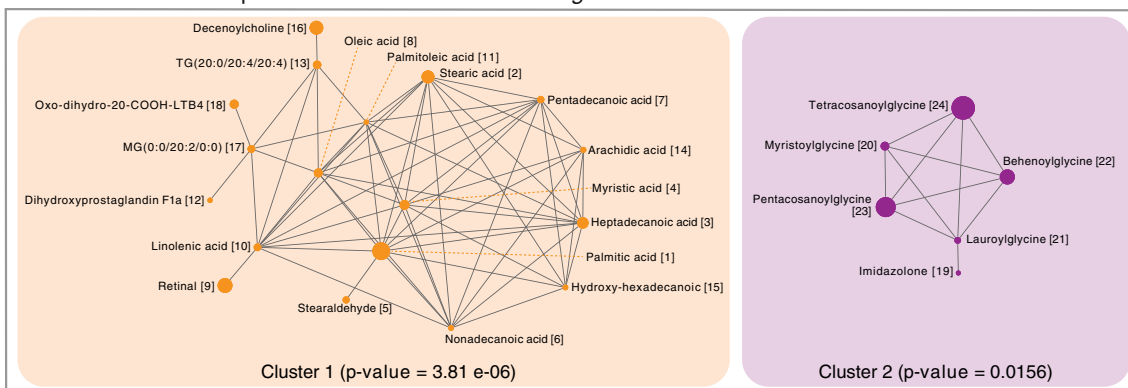

(legend on next page)

in these experiments were efficiently recovered from the feces, bacterial death in the mouse intestine certainly contributes to the metabolite load. This is not restricted to the HA107 model: *in vivo* replication rates and overall dynamics indicate high rates of bacterial death in the intestine (Li et al., 2015; Myhrvold et al., 2015). Partitioning of bacterial molecules from effete cells into the host has parallels with symbiosis in the rhizosphere. Nevertheless, given the inflammatory potential of bacterial molecules, the vulnerability of the host is reduced by antibodies that likely limit its exposure to metabolites from dead bacteria.

Exposure to intestinal microbes drives durable adaptation of the intestinal mucosa through immune and non-immune mechanisms. Beneficial effects of intestinal Ig secretion include toxin and virus neutralization, blocking excessive live bacterial translocation, clearance of unwanted macromolecular structures at the epithelial surface, and directed sampling of luminal antigen (Macpherson et al., 2018). Lack of specific IgA has been shown to increase transcriptional evidence of innate immune system activation in the intestine (Peterson et al., 2007). We now show that antibody induction and secretion decreases microbial motility, accelerates *in vivo* intestinal transit, and limits exposure of the small intestinal mucosa to the pro-inflammatory molecular constituents of intestinal microbes. Only extremely low titers of specific serum IgG occur after intestinal preconditioning (Gomez de Agüero et al., 2016); we therefore tested the elimination of all antibody isotypes to avoid the compensatory effects of IgM secretion and increased IgG induction in IgA deficiency (Harri-man et al., 1999) or the enteropathy that occurs with polymeric immunoglobulin receptor deficiency (Johansen et al., 1999). It is likely that affinity matured secretory IgM can compensate IgA, and a role for IgG isotypes is not excluded.

These effects are poised on the small intestinal mucosa, where limiting bacterial metabolite uptake must be set against the necessity for nutrient absorption. In humans in the developed world, the lower small intestine has a microbial biomass of up to  $10^7$  organisms/mL intestinal contents. Globally, microbial colonization of the small intestine remains a severe problem. One of the most urgent biomedical problems of our age is to understand why the presence of high densities of small intestinal microbes in children from the undeveloped world causes intestinal dysfunction and infant malnutrition that cannot be adequately treated with caloric increases (Kau et al., 2015; Smith et al., 2013a). Compensatory IgA that limits microbial metabolite exposure by decreasing the small intestinal dwell time may contribute to the protective effect for taxa that do not attach to or invade the epithelium. Reduction in an intestinal clearance effect is also consistent with the small intestinal lymphonodular hyperplasia in the setting of IgA and affinity matured IgM deficiency, owing to a deletion of activation-induced cytidine deaminase (Fagarasan et al., 2002).

We have distinguished bacterial metabolite exposure and resultant host responses with extremely wide coverage, even

where the same molecule can be derived from either bacterial or host metabolism. The results attest to pervasive microbial metabolite exposure, over many classes of metabolites, including increased bacterial lipid penetration. A high proportion of the penetrant microbial metabolites were very rapidly excreted in the urine, although there were also durable increases, some of which benefit the host, such as essential amino acids. To be able to interrogate bacterial metabolite penetration at the same time as the host molecular response using stable isotope tracing, the model was limited to a single taxon; metabolite exposure from other taxa may vary according to their frequencies, flagellate statuses, and metabolic pathway differences.

While the breadth of metabolic exchange allows a broad portfolio of metabolic responses, the predominant effect in antibody-deficient fasting mice was lipidemia of both microbial and host origin, and host lipid breakdown in the intestine and the muscle. Breakdown of phospholipid components in the intestine was also accompanied by prostaglandin and leukotriene synthesis. Extending our model could potentially separate host or dietary molecular effects from microbial molecular effects in the fed as well as the fasting state.

A substantial investment of metabolic energy is made in the secretory IgA response which comprises approximately 75% of all immunoglobulin production in mammals (Macpherson et al., 2008), most of which is secreted in the small intestine. The small intestine is a delicately positioned interface with the environment. On one hand, it is specialized for uptake of nutrients with minimal mucus covering and a combination of digestive and secretory mechanisms. Some of these nutrients are products of microbial metabolism, including vitamins, short chain fatty acids, and compounds capable of receptor signaling mechanisms that mature host organ systems (Gomez de Agüero et al., 2016). On the other hand, the small intestine must handle the inevitable contamination with intestinal microbes that expose the host to a range of compounds that potentially result in innate immune activation: this it does with a combination of physiological adaptations to clear microbial compounds quickly into the urine and secretory immunoglobulins accelerating transit away from the susceptible small intestinal mucosa, thereby modulating both microbial penetration into the host and the resultant host immune and metabolic responses.

## STAR★METHODS

Detailed methods are provided in the online version of this paper and include the following:

- KEY RESOURCES TABLE
- CONTACT FOR REAGENT AND RESOURCE SHARING

### Figure 7. Tanimoto Chemical Similarity Networks of Increased Metabolite Responses in Conditioned Antibody-Deficient Mice after Microbial Challenge

Tanimoto chemical similarity indices of increased host response metabolites in both  $^{13}\text{C}$ - and  $^{12}\text{C}$ -pulsed mice without mass shift of the annotated ions were analyzed as described in Figure 5. Networks from the ileum (A), the pancreas (B), or the blood (C) are shown with interconnected chemical similarities  $\geq 0.7$ . Numbers in squared brackets correspond to chemical annotations for each metabolite in Table S3. Node size represents the absolute value of  $\Delta$ -fold change difference between conditioned and control germ-free *Igh-J<sup>-/-</sup>*. Paired Mann-Whitney U test was applied to calculate p value of each network. Results are representative of two independent experiments with 3–4 mice/group. See also Figures S6 and S7.

## ● EXPERIMENTAL MODEL AND SUBJECT DETAILS

- Mice
- Microbe strains

## ● METHOD DETAILS

- Preconditioning the intestinal mucosa through transient bacterial colonization in germ-free mice
- Preparation of <sup>13</sup>C-labeled bacteria
- Mass spectrometry
- Determining the extent of <sup>13</sup>C-labeling in *E. coli* HA107 used for stable isotope tracing
- Metabolomics data analysis
- Preparation of <sup>14</sup>C-labeled bacteria
- Cecal injection
- Liquid scintillation counting
- RNA isolation
- Live intestinal endomicroscopy
- Enzyme-linked immunosorbent assay (ELISA)
- Bacterial immunofluorescent staining
- Bacterial motility assay
- Bacterial intestinal transit time
- Metabolite-specific ELISA
- Cytokine release assays
- Intraperitoneal challenge with pentadecanoic acid or 5-methoxytryptamine
- Cytokine quantification

## ● QUANTIFICATION AND STATISTICAL ANALYSIS

## ● DATA AND SOFTWARE AVAILABILITY

## SUPPLEMENTAL INFORMATION

Supplemental Information includes seven figures, three tables, and two videos and can be found with this article online at <https://doi.org/10.1016/j.immuni.2018.08.004>.

## ACKNOWLEDGMENTS

We thank the staff of the clean mouse facility of the University of Bern and Professors Wolf Hardt and Christoph Mueller for their comments. We thank Jamie Macpherson, Dr. Irene Keller, Dr. Fabian Blank, and Carlos A. Wotzkow for assistance. The work was supported by the Genaxen Foundation, the Swiss National Science Foundation (SNSF 310030B\_160262 and SNF Sinergia CRSII3\_136286 to A.J.M. and SNSF Sinergia CRSII3\_154414 to A.J.M. and U.S.), and the Systems X program (GutX A.J.M. and U.S.).

## AUTHOR CONTRIBUTIONS

A.J.M. and U.S. conceived and designed the project. A.J.M., U.S., and K.D.M. supervised experiments. Y.U., H.L., M.A.L., A.J.M., M.G.A., B.Y., F.R., S.C.G.-V., and M.S. performed metabolomics sampling and bacterial experiments. T.F. and M.Z. performed mass spectrometry and data processing. Y.U., T.F., and A.J.M. performed bioinformatics analysis. H.L. and M.A.L. performed intestinal bacterial transit experiments. H.L., J.Z., and B.Y. performed cytokine experiments. S.H. provided *E. coli* HA107. A.J.M., U.S., Y.U., H.L., and T.F. wrote the manuscript.

## DECLARATION OF INTERESTS

The authors declare no competing interests.

Received: October 2, 2017

Revised: June 12, 2018

Accepted: August 3, 2018

Published: September 4, 2018

## REFERENCES

- Anders, S., Pyl, P.T., and Huber, W. (2015). HTSeq—a Python framework to work with high-throughput sequencing data. *Bioinformatics* 31, 166–169.
- Arpaia, N., Campbell, C., Fan, X., Dikiy, S., van der Veecken, J., deRoos, P., Liu, H., Cross, J.R., Pfeffer, K., Coffey, P.J., and Rudensky, A.Y. (2013). Metabolites produced by commensal bacteria promote peripheral regulatory T-cell generation. *Nature* 504, 451–455.
- Bäckhed, F., Roswall, J., Peng, Y., Feng, Q., Jia, H., Kovatcheva-Datchary, P., Li, Y., Xia, Y., Xie, H., Zhong, H., et al. (2015). Dynamics and stabilization of the human gut microbiome during the first year of life. *Cell Host Microbe* 17, 690–703.
- Barupal, D.K., Haldiya, P.K., Wohlgemuth, G., Kind, T., Kothari, S.L., Pinkerton, K.E., and Fiehn, O. (2012). MetaMapp: mapping and visualizing metabolomic data by integrating information from biochemical pathways and chemical and mass spectral similarity. *BMC Bioinformatics* 13, 99.
- Beatty, D.W., Napier, B., Sinclair-Smith, C.C., McCabe, K., and Hughes, E.J. (1983). Secretory IgA synthesis in Kwashiorkor. *J. Clin. Lab. Immunol.* 12, 31–36.
- Belkaid, Y., and Harrison, O.J. (2017). Homeostatic immunity and the microbiota. *Immunity* 46, 562–576.
- Blumberg, R., and Powrie, F. (2012). Microbiota, disease, and back to health: a metastable journey. *Sci. Transl. Med.* 4, 137rv7.
- Bolger, A.M., Lohse, M., and Usadel, B. (2014). Trimmomatic: a flexible trimmer for Illumina sequence data. *Bioinformatics* 30, 2114–2120.
- Brugiroux, S., Beutler, M., Pfann, C., Garzetti, D., Ruscheweyh, H.J., Ring, D., Diehl, M., Herp, S., Lötscher, Y., Hussain, S., et al. (2016). Genome-guided design of a defined mouse microbiota that confers colonization resistance against *Salmonella enterica* serovar Typhimurium. *Nat. Microbiol.* 2, 16215.
- Bunker, J.J., Flynn, T.M., Koval, J.C., Shaw, D.G., Meisel, M., McDonald, B.D., Ishizuka, I.E., Dent, A.L., Wilson, P.C., Jabri, B., et al. (2015). Innate and adaptive humoral responses coat distinct commensal bacteria with immunoglobulin A. *Immunity* 43, 541–553.
- Bunker, J.J., Erickson, S.A., Flynn, T.M., Henry, C., Koval, J.C., Meisel, M., Jabri, B., Antonopoulos, D.A., Wilson, P.C., and Bendelac, A. (2017). Natural polyreactive IgA antibodies coat the intestinal microbiota. *Science* 358, 358.
- Chen, J., Trounstein, M., Alt, F.W., Young, F., Kurahara, C., Loring, J.F., and Huszar, D. (1993). Immunoglobulin gene rearrangement in B cell deficient mice generated by targeted deletion of the JH locus. *Int. Immunol.* 5, 647–656.
- Cotran, R., Kendrick, M.I., and Kass, E.H. (1960). Role of intestinal bacteria in aromatization of quinic acid in man and guinea pig. *Proc. Soc. Exp. Biol. Med.* 104, 424–426.
- Cullender, T.C., Chassaing, B., Janzon, A., Kumar, K., Muller, C.E., Werner, J.J., Angenent, L.T., Bell, M.E., Hay, A.G., Peterson, D.A., et al. (2013). Innate and adaptive immunity interact to quench microbiome flagellar motility in the gut. *Cell Host Microbe* 14, 571–581.
- Dayman, J., and Jepson, J.B. (1969). The metabolism of caffeic acid in humans: the dehydroxylating action of intestinal bacteria. *Biochem. J.* 113, 11P.
- de Graaf, A.A., Maathuis, A., de Waard, P., Deutz, N.E., Dijkema, C., de Vos, W.M., and Venema, K. (2010). Profiling human gut bacterial metabolism and its kinetics using [<sup>13</sup>C]glucose and NMR. *NMR Biomed.* 23, 2–12.
- Donowitz, J.R., Haque, R., Kirkpatrick, B.D., Alam, M., Lu, M., Kabir, M., Kakon, S.H., Islam, B.Z., Afreen, S., Musa, A., et al. (2016). Small intestine bacterial overgrowth and environmental enteropathy in Bangladeshi children. *MBio* 7, e02102–e02115.
- El Aidi, S., Merrifield, C.A., Derrien, M., van Baaren, P., Hooiveld, G., Levenez, F., Doré, J., Dekker, J., Holmes, E., Claus, S.P., et al. (2013). The gut microbiota elicits a profound metabolic reorientation in the mouse jejunal mucosa during conventionalisation. *Gut* 62, 1306–1314.
- Ertunc, M.E., and Hotamisligil, G.S. (2016). Lipid signaling and lipotoxicity in metaflammation: indications for metabolic disease pathogenesis and treatment. *J. Lipid Res.* 57, 2099–2114.

- Fagarasan, S., Muramatsu, M., Suzuki, K., Nagaoka, H., Hiai, H., and Honjo, T. (2002). Critical roles of activation-induced cytidine deaminase in the homeostasis of gut flora. *Science* 298, 1424–1427.
- Fuhrer, T., Heer, D., Begemann, B., and Zamboni, N. (2011). High-throughput, accurate mass metabolome profiling of cellular extracts by flow injection-time-of-flight mass spectrometry. *Anal. Chem.* 83, 7074–7080.
- Fuhrer, T., Zampieri, M., Sévin, D.C., Sauer, U., and Zamboni, N. (2017). Genomewide landscape of gene-metabolome associations in *Escherichia coli*. *Mol. Syst. Biol.* 13, 907.
- Gensollen, T., Iyer, S.S., Kasper, D.L., and Blumberg, R.S. (2016). How colonization by microbiota in early life shapes the immune system. *Science* 352, 539–544.
- Gomez de Agüero, M., Ganal-Vonarburg, S.C., Fuhrer, T., Rupp, S., Uchimura, Y., Li, H., Steinert, A., Heikenwalder, M., Hapfelmeier, S., Sauer, U., et al. (2016). The maternal microbiota drives early postnatal innate immune development. *Science* 351, 1296–1302.
- Gu, Z., Eils, R., and Schlesner, M. (2016). Complex heatmaps reveal patterns and correlations in multidimensional genomic data. *Bioinformatics* 32, 2847–2849.
- Hapfelmeier, S., Lawson, M.A., Slack, E., Kirundi, J.K., Stoel, M., Heikenwalder, M., Cahenzli, J., Velykoredko, Y., Balmer, M.L., Endt, K., et al. (2010). Reversible microbial colonization of germ-free mice reveals the dynamics of IgA immune responses. *Science* 328, 1705–1709.
- Harriman, G.R., Bogue, M., Rogers, P., Finegold, M., Pacheco, S., Bradley, A., Zhang, Y., and Mbawuike, I.N. (1999). Targeted deletion of the IgA constant region in mice leads to IgA deficiency with alterations in expression of other Ig isotypes. *J. Immunol.* 162, 2521–2529.
- Hooper, L.V., Wong, M.H., Thelin, A., Hansson, L., Falk, P.G., and Gordon, J.I. (2001). Molecular analysis of commensal host-microbial relationships in the intestine. *Science* 291, 881–884.
- Johansen, F.E., Pekna, M., Norderhaug, I.N., Haneberg, B., Hietala, M.A., Krajci, P., Betsholtz, C., and Brandtzaeg, P. (1999). Absence of epithelial immunoglobulin A transport, with increased mucosal leakiness, in polymeric immunoglobulin receptor/secretory component-deficient mice. *J. Exp. Med.* 190, 915–922.
- Johansson, M.E., Phillipson, M., Petersson, J., Velcich, A., Holm, L., and Hansson, G.C. (2008). The inner of the two Muc2 mucin-dependent mucus layers in colon is devoid of bacteria. *Proc. Natl. Acad. Sci. USA* 105, 15064–15069.
- Jones, H.F., Davidson, G.P., Brooks, D.A., and Butler, R.N. (2011). Is small-bowel bacterial overgrowth an underdiagnosed disorder in children with gastrointestinal symptoms? *J. Pediatr. Gastroenterol. Nutr.* 52, 632–634.
- Kau, A.L., Planer, J.D., Liu, J., Rao, S., Yatsunenko, T., Trehan, I., Manary, M.J., Liu, T.C., Stappenbeck, T.S., Maleta, K.M., et al. (2015). Functional characterization of IgA-targeted bacterial taxa from undernourished Malawian children that produce diet-dependent enteropathy. *Sci. Transl. Med.* 7, 276ra24.
- Kim, D., Perteza, G., Trapnell, C., Pimentel, H., Kelley, R., and Salzberg, S.L. (2013). TopHat2: accurate alignment of transcriptomes in the presence of insertions, deletions and gene fusions. *Genome Biol.* 14, R36.
- Korpe, P.S., and Petri, W.A., Jr. (2012). Environmental enteropathy: critical implications of a poorly understood condition. *Trends Mol. Med.* 18, 328–336.
- Li, H., Handsaker, B., Wysoker, A., Fennell, T., Ruan, J., Homer, N., Marth, G., Abecasis, G., and Durbin, R.; 1000 Genome Project Data Processing Subgroup (2009). The Sequence Alignment/Map format and SAMtools. *Bioinformatics* 25, 2078–2079.
- Li, H., Limenitakis, J.P., Fuhrer, T., Geuking, M.B., Lawson, M.A., Wyss, M., Brugiroux, S., Keller, I., Macpherson, J.A., Rupp, S., et al. (2015). The outer mucus layer hosts a distinct intestinal microbial niche. *Nat. Commun.* 6, 8292.
- Love, M.I., Huber, W., and Anders, S. (2014). Moderated estimation of fold change and dispersion for RNA-seq data with DESeq2. *Genome Biol.* 15, 550.
- Macpherson, A.J., Gatto, D., Sainsbury, E., Harriman, G.R., Hengartner, H., and Zinkernagel, R.M. (2000). A primitive T cell-independent mechanism of intestinal mucosal IgA responses to commensal bacteria. *Science* 288, 2222–2226.
- Macpherson, A.J., McCoy, K.D., Johansen, F.E., and Brandtzaeg, P. (2008). The immune geography of IgA induction and function. *Mucosal Immunol.* 1, 11–22.
- Macpherson, A.J., Yilmaz, B., Limenitakis, J.P., and Ganal-Vonarburg, S.C. (2018). IgA function in relation to the intestinal microbiota. *Annu. Rev. Immunol.* 36, 359–381.
- Maurice, C.F., Haiser, H.J., and Turnbaugh, P.J. (2013). Xenobiotics shape the physiology and gene expression of the active human gut microbiome. *Cell* 152, 39–50.
- Myhrvold, C., Kotula, J.W., Hicks, W.M., Conway, N.J., and Silver, P.A. (2015). A distributed cell division counter reveals growth dynamics in the gut microbiota. *Nat. Commun.* 6, 10039.
- Nanchen, A., Fuhrer, T., and Sauer, U. (2007). Determination of metabolic flux ratios from <sup>13</sup>C-experiments and gas chromatography-mass spectrometry data: protocol and principles. *Methods Mol. Biol.* 358, 177–197.
- Nicholls, A.W., Mortishire-Smith, R.J., and Nicholson, J.K. (2003). NMR spectroscopic-based metabolomic studies of urinary metabolite variation in acclimatizing germ-free rats. *Chem. Res. Toxicol.* 16, 1395–1404.
- Orth, J.D., Conrad, T.M., Na, J., Lerman, J.A., Nam, H., Feist, A.M., and Palsson, B.O. (2011). A comprehensive genome-scale reconstruction of *Escherichia coli* metabolism–2011. *Mol. Syst. Biol.* 7, 535.
- Padmanabhan, P., Grosse, J., Asad, A.B., Radda, G.K., and Golay, X. (2013). Gastrointestinal transit measurements in mice with <sup>99m</sup>Tc-DTPA-labeled activated charcoal using NanoSPECT-CT. *EJNMMI Res.* 3, 60.
- Perry, R.J., Peng, L., Barry, N.A., Cline, G.W., Zhang, D., Cardone, R.L., Petersen, K.F., Kibbey, R.G., Goodman, A.L., and Shulman, G.I. (2016). Acetate mediates a microbiome-brain-β-cell axis to promote metabolic syndrome. *Nature* 534, 213–217.
- Peterson, D.A., McNulty, N.P., Guruge, J.L., and Gordon, J.I. (2007). IgA response to symbiotic bacteria as a mediator of gut homeostasis. *Cell Host Microbe* 2, 328–339.
- Petersson, J., Schreiber, O., Hansson, G.C., Gendler, S.J., Velcich, A., Lundberg, J.O., Roos, S., Holm, L., and Phillipson, M. (2011). Importance and regulation of the colonic mucus barrier in a mouse model of colitis. *Am. J. Physiol. Gastrointest. Liver Physiol.* 300, G327–G333.
- Sajed, T., Marcu, A., Ramirez, M., Pon, A., Guo, A.C., Knox, C., Wilson, M., Grant, J.R., Djoumbou, Y., and Wishart, D.S. (2016). ECMDB 2.0: A richer resource for understanding the biochemistry of *E. coli*. *Nucleic Acids Res.* 44 (D1), D495–D501.
- Salzman, N.H., Hung, K., Haribhai, D., Chu, H., Karlsson-Sjöberg, J., Amir, E., Teggatz, P., Barman, M., Hayward, M., Eastwood, D., et al. (2010). Enteric defensins are essential regulators of intestinal microbial ecology. *Nat. Immunol.* 11, 76–83.
- Sévin, D.C., Fuhrer, T., Zamboni, N., and Sauer, U. (2017). Nontargeted *in vitro* metabolomics for high-throughput identification of novel enzymes in *Escherichia coli*. *Nat. Methods* 14, 187–194.
- Smith, K., McCoy, K.D., and Macpherson, A.J. (2007). Use of axenic animals in studying the adaptation of mammals to their commensal intestinal microbiota. *Semin. Immunol.* 19, 59–69.
- Smith, M.I., Yatsunenko, T., Manary, M.J., Trehan, I., Mkakosya, R., Cheng, J., Kau, A.L., Rich, S.S., Concannon, P., Mychaleckyj, J.C., et al. (2013a). Gut microbiomes of Malawian twin pairs discordant for kwashiorkor. *Science* 339, 548–554.
- Smith, P.M., Howitt, M.R., Panikov, N., Michaud, M., Gallini, C.A., Bohlooly-Y, M., Glickman, J.N., and Garrett, W.S. (2013b). The microbial metabolites, short-chain fatty acids, regulate colonic Treg cell homeostasis. *Science* 341, 569–573.
- Smoot, M.E., Ono, K., Ruscheinski, J., Wang, P.L., and Ideker, T. (2011). Cytoscape 2.8: new features for data integration and network visualization. *Bioinformatics* 27, 431–432.
- Sommer, F., and Bäckhed, F. (2013). The gut microbiota—masters of host development and physiology. *Nat. Rev. Microbiol.* 11, 227–238.

- Stappenbeck, T.S., Hooper, L.V., and Gordon, J.I. (2002). Developmental regulation of intestinal angiogenesis by indigenous microbes via Paneth cells. *Proc. Natl. Acad. Sci. USA* 99, 15451–15455.
- Szklarczyk, D., Franceschini, A., Wyder, S., Forslund, K., Heller, D., Huerta-Cepas, J., Simonovic, M., Roth, A., Santos, A., Tsafou, K.P., et al. (2015). STRING v10: protein-protein interaction networks, integrated over the tree of life. *Nucleic Acids Res.* 43, D447–D452.
- Tannock, G.W., Lawley, B., Munro, K., Sims, I.M., Lee, J., Butts, C.A., and Roy, N. (2014). RNA-stable-isotope probing shows utilization of carbon from inulin by specific bacterial populations in the rat large bowel. *Appl. Environ. Microbiol.* 80, 2240–2247.
- Uchimura, Y., Wyss, M., Brugiroux, S., Limenitakis, J.P., Stecher, B., McCoy, K.D., and Macpherson, A.J. (2016). Complete genome sequences of 12 species of a stable defined moderately diverse microbiota 2. *Genome Announc.* 4, e00951–e00916.
- Vaishnava, S., Yamamoto, M., Severson, K.M., Ruhn, K.A., Yu, X., Koren, O., Ley, R., Wakeland, E.K., and Hooper, L.V. (2011). The antibacterial lectin RegIII $\gamma$  promotes the spatial segregation of microbiota and host in the intestine. *Science* 334, 255–258.
- Vianey-Liaud, C., Divry, P., Gregersen, N., and Mathieu, M. (1987). The inborn errors of mitochondrial fatty acid oxidation. *J. Inherit. Metab. Dis.* 10 (Suppl 1), 159–200.
- Williams, R.E., Eytton-Jones, H.W., Farnworth, M.J., Gallagher, R., and Provan, W.M. (2002). Effect of intestinal microflora on the urinary metabolic profile of rats: a (1)H-nuclear magnetic resonance spectroscopy study. *Xenobiotica* 32, 783–794.
- Wishart, D.S., Jewison, T., Guo, A.C., Wilson, M., Knox, C., Liu, Y., Djombou, Y., Mandal, R., Aziat, F., Dong, E., et al. (2013). HMDB 3.0—The Human Metabolome Database in 2013. *Nucleic Acids Res.* 41, D801–D807.



## STAR★METHODS

## KEY RESOURCES TABLE

| REAGENT or RESOURCE                                                | SOURCE                                        | IDENTIFIER                                                                                                                                                                                                                |
|--------------------------------------------------------------------|-----------------------------------------------|---------------------------------------------------------------------------------------------------------------------------------------------------------------------------------------------------------------------------|
| <b>Antibodies</b>                                                  |                                               |                                                                                                                                                                                                                           |
| Goat anti-mouse IgA                                                | Bio-Rad / AbD Serotec                         | Cat# STAR137; RRID: AB_2075638                                                                                                                                                                                            |
| HRP-conjugated anti-mouse IgA                                      | Sigma-Aldrich                                 | Cat# A4789; RRID: AB_258201                                                                                                                                                                                               |
| Mouse IgA, k antibody                                              | BD Biosciences                                | Cat# 553476; RRID: AB_479590                                                                                                                                                                                              |
| FITC Rat anti-mouse IgA                                            | BD Biosciences                                | Cat# 559354; RRID: AB_397235                                                                                                                                                                                              |
| <b>Bacterial and Virus Strains</b>                                 |                                               |                                                                                                                                                                                                                           |
| <i>E. coli</i> MG1655                                              | ATCC                                          | ATCC 47076                                                                                                                                                                                                                |
| <i>E. coli</i> JM83                                                | ATCC                                          | ATCC 35607                                                                                                                                                                                                                |
| <i>E. coli</i> HA107                                               | Hapfelmeier et al., 2010                      | This strain is available from A.J.M. under a material transfer agreement with the University of Bern                                                                                                                      |
| sDMDMm2 microbiota                                                 | Brugiroux et al., 2016; Uchimura et al., 2016 | DSM 26114, 26090, 26085, 28989, 26109, 26113, 26115, 26117, 26074, 32035, 26127, 32036                                                                                                                                    |
| <b>Chemicals, Peptides, and Recombinant Proteins</b>               |                                               |                                                                                                                                                                                                                           |
| <sup>13</sup> C-D-glucose                                          | Cambridge Isotope Laboratories                | Cat#CLM-1396                                                                                                                                                                                                              |
| 2-[ <sup>14</sup> C]-deoxy-D-glucose                               | Perkin Elmer                                  | Cat#NEC495A001MC                                                                                                                                                                                                          |
| Fluorescein isothiocyanate-dextran average molecular weight 70 kDa | Sigma-Aldrich                                 | Cat#46945                                                                                                                                                                                                                 |
| <b>Deposited Data</b>                                              |                                               |                                                                                                                                                                                                                           |
| Raw and analyzed RNA-seq data                                      | This paper                                    | GEO: GSE102543                                                                                                                                                                                                            |
| <b>Experimental Models: Organisms/Strains</b>                      |                                               |                                                                                                                                                                                                                           |
| <i>Mus musculus</i> : Strain C57BL/6(J)                            | University of Zürich                          | The colony has been bred in the Macpherson laboratory for more than 12 years.                                                                                                                                             |
| <i>Mus musculus</i> : Strain <i>Igh</i> -J <sup>-/-</sup>          | Chen et al., 1993                             | The original <i>Igh</i> -J <sup>-/-</sup> was backcrossed with C57BL/6(J).                                                                                                                                                |
| <b>Software and Algorithms</b>                                     |                                               |                                                                                                                                                                                                                           |
| R and RStudio                                                      | R Consortium                                  | <a href="https://www.rstudio.com/">https://www.rstudio.com/</a>                                                                                                                                                           |
| ggplot2 in R                                                       | Hadley Wickham                                | <a href="http://ggplot2.org/">http://ggplot2.org/</a>                                                                                                                                                                     |
| ComplexHeatmap in R                                                | Gu et al., 2016                               | <a href="https://bioconductor.org/packages/release/bioc/html/ComplexHeatmap.html">https://bioconductor.org/packages/release/bioc/html/ComplexHeatmap.html</a>                                                             |
| GraphPad PRISM Version 6.0h                                        | GraphPad Software                             | <a href="https://www.graphpad.com/">https://www.graphpad.com/</a>                                                                                                                                                         |
| FastQC version 0.11.2                                              | Simon Andrews                                 | <a href="https://www.bioinformatics.babraham.ac.uk/projects/fastqc/">https://www.bioinformatics.babraham.ac.uk/projects/fastqc/</a>                                                                                       |
| Trimmomatic version 0.33                                           | Bolger et al., 2014                           | <a href="http://www.usadellab.org/cms/?page=trimmomatic">http://www.usadellab.org/cms/?page=trimmomatic</a>                                                                                                               |
| TopHat version 2.0.13                                              | Kim et al., 2013                              | <a href="https://ccb.jhu.edu/software/tophat/index.shtml">https://ccb.jhu.edu/software/tophat/index.shtml</a>                                                                                                             |
| Samtools version 1.3                                               | Li et al., 2009                               | <a href="http://www.htslib.org/">http://www.htslib.org/</a>                                                                                                                                                               |
| HTSeq version 0.6.1                                                | Anders et al., 2015                           | <a href="https://htseq.readthedocs.io/en/release_0.9.1/">https://htseq.readthedocs.io/en/release_0.9.1/</a>                                                                                                               |
| DESeq2 in R                                                        | Love et al., 2014                             | <a href="http://bioconductor.org/packages/release/bioc/html/DESeq2.html">http://bioconductor.org/packages/release/bioc/html/DESeq2.html</a>                                                                               |
| STRING version 10.5                                                | Szklarczyk et al., 2015                       | <a href="https://string-db.org/">https://string-db.org/</a>                                                                                                                                                               |
| Metamapp                                                           | Barupal et al., 2012                          | <a href="https://github.com/barupal/metamapp">https://github.com/barupal/metamapp</a>                                                                                                                                     |
| Cytoscape 3.4.0                                                    | Smoot et al., 2011                            | <a href="http://www.cytoscape.org/">http://www.cytoscape.org/</a>                                                                                                                                                         |
| <b>Other</b>                                                       |                                               |                                                                                                                                                                                                                           |
| Metabolomics data                                                  | This paper                                    | <a href="http://www.mucosalimmunology.ch/de/The-lab-University-of-Bern/Supplementary-resources-of-Publications">http://www.mucosalimmunology.ch/de/The-lab-University-of-Bern/Supplementary-resources-of-Publications</a> |

## CONTACT FOR REAGENT AND RESOURCE SHARING

Further information and requests for reagents may be directed to, and will be fulfilled by, the Lead Contact, Andrew J. Macpherson ([andrew.macpherson@insel.ch](mailto:andrew.macpherson@insel.ch)).

## EXPERIMENTAL MODEL AND SUBJECT DETAILS

### Mice

Germ-free C57BL/6(J) and *Igh-J<sup>-/-</sup>* (Chen et al., 1993) mice were born and maintained in flexible-film isolators in the Clean Mouse Facility, University of Bern, Switzerland. Age and gender-matched mice were used at 10-12 weeks for the metabolomics samplings in this study. All mice were independently confirmed to be pathogen-free. They were also verified germ-free within the breeding isolators and during experiments (apart from the transient colonization and the colonized experiment shown in Figures S5B and S5C) by culture-dependent and -independent methods. All mouse experiments were performed in accordance with Swiss Federal and Cantonal regulations.

### Microbe strains

*Escherichia coli* HA107 was constructed as an auxotrophic *E. coli* strain lacking synthetic capabilities of two amino acids, meso-DAP and D-alanine (Hapfelmeier et al., 2010). It grows equivalent to wild-type *E. coli* via supplementing with 100 µg/mL meso-DAP and 400 µg/mL D-alanine *in vitro*, and only transiently colonizes germ-free mice due to its auxotroph (Hapfelmeier et al., 2010).

## METHOD DETAILS

### Preconditioning the intestinal mucosa through transient bacterial colonization in germ-free mice

*E. coli* HA107 bacterial overnight cultures were centrifuged at 3480g for 10 min at 4°C. After washing twice with sterile PBS, the required dose of bacteria was resuspended in PBS (10<sup>10</sup> CFU per 500 µl). The bacterial solution was gavaged directly into the mouse stomach on alternate days four times. One week after the last HA107 gavage, the feces from the mice were routinely verified by culture-dependent and -independent methods to be germ-free. Control germ-free mice were similarly treated in parallel throughout, although gavaged with an equivalent volume of sterile PBS. Preconditioned mice were studied further 14 days after the last conditioning dose.

### Preparation of <sup>13</sup>C-labeled bacteria

To prepare <sup>13</sup>C-labeled HA107, sterile <sup>13</sup>C-labeled bacterial extracts from *E. coli* MG1655 were used as source of <sup>13</sup>C-labeled amino acids and vitamins. For this, *E. coli* MG1655 was initially cultured in M9 medium using <sup>13</sup>C-D-glucose (Cambridge Isotope Laboratories) as sole carbon source. After three sequential subcultures, fully <sup>13</sup>C-labeled MG1655 bacterial extracts were obtained and sterilized by filtration (0.22 µm). *E. coli* HA107 was then cultured in M9 medium containing <sup>13</sup>C-D-glucose and <sup>13</sup>C-labeled bacterial extracts from *E. coli* MG1655. After three sequential cultures, the HA107 bacterial culture was centrifuged at 3480 g for 10 min at 4°C. After washing twice with sterile PBS, the required dose of HA107 bacteria was suspended in PBS (10<sup>10</sup> CFU per 500 µl). We verified that this protocol achieved essentially complete (> 90%) <sup>13</sup>C-labeling of the carbon chains of all bacterial molecules across all compound classes (Figures S1D and S1E).

### Mass spectrometry

Samples were snap-frozen in liquid nitrogen. To prepare fluid samples for mass spectrometry, weighed fluid samples (50 µg) were precipitated with final 80% methanol for 1 hour at -20°C. After centrifugation at 20,000 g for 10 min at room temperature, the supernatant was transferred to Q-TOF plates. To prepare tissue samples for mass spectrometry, metabolites from weighed tissue samples (50 µg) were extracted with 20 times weight of Millipore water (80°C) followed by homogenization at 25 Hz for 2 min in a tissue homogenizer (Retsch MM 400) with a clean steel ball (Berani). After centrifugation at 20,000 g for 10 min at room temperature, supernatants were transferred to Q-TOF plates.

Quantification of relative metabolites concentrations was carried out with an Agilent 6550 Q-TOF mass spectrometer (Agilent Technologies Inc., Santa Clara, CA) by non-targeted flow injection analysis as described previously (Fuhrer et al., 2011). Profile spectra with high mass accuracy were recorded from 50 to 1000 m/z in negative ionization mode. The common mass axis after sample alignment was recalibrated using known frequently occurring metabolite ions. Ions were finally annotated based on accurate mass comparison using 1 mDa mass tolerance against 9261 unique metabolites present in a pooled list of compounds derived from the Human Metabolome Database (Wishart et al., 2013), *E. coli* genome scale-model (Orth et al., 2011) and the *E. coli* Metabolome Database (Sajed et al., 2016). All potentially possible <sup>13</sup>C isotopes were annotated taking into account the respective sum mass formula.

### Determining the extent of <sup>13</sup>C-labeling in *E. coli* HA107 used for stable isotope tracing

The free intracellular metabolites were extracted from the cell pellet with Millipore water at 80°C and analyzed by non-targeted flow injection analysis as described above. Proteinogenic amino acids were obtained from the extracted pellet after hydrolysis with 6 M

HCl and subsequently derivatized with N-methyl-N-(tert-butyldimethylsilyl)-trifluoroacetamide as described previously (Nanchen et al., 2007). The  $^{13}\text{C}$ -labeling patterns were then determined on a 6890N Network GC system with a 5975 inert XL mass selective detector (Agilent Technologies Inc., Santa Clara, CA). Fractional label for both intracellular metabolites and proteinogenic amino acids was then estimated from the relative abundances of  $m_0$  and  $m_{\text{max}}$  ion counts as  $m_{\text{max}} / (m_0 + m_{\text{max}})$ .

### Metabolomics data analysis

$\text{Log}_2$  fold-changes of  $^{13}\text{C}$ -labeled compounds were calculated from the division of [positive ion counts at  $m+x$  isotope annotation from  $^{13}\text{C}$ -HA107 gavaged samples] by [ion counts at  $m+x$  isotope annotation from PBS gavaged samples].  $\Delta\text{Log}_2$  fold-change was calculated from the subtraction of [ $\text{Log}_2$  fold-change of germ-free control mice] from [ $\text{Log}_2$  fold-change of conditioned mice].  $\text{Log}_2$  fold-changes of  $^{12}\text{C}$  compounds in  $^{13}\text{C}$ -HA107 gavaged samples were calculated from the division of [ion counts at  $m_0$  annotation from  $^{13}\text{C}$ -HA107 gavaged samples] by [ion counts at  $m_0$  annotation from PBS gavaged samples]. In the same way,  $\text{Log}_2$  fold-change of  $^{12}\text{C}$  compounds in  $^{12}\text{C}$ -HA107 gavaged samples were calculated from the division of [ion counts at  $m_0$  annotation from  $^{12}\text{C}$ -HA107 gavaged samples] by [ion counts at  $m_0$  annotation from PBS gavaged samples]. For the host response of endogenous  $^{12}\text{C}$  compounds, compounds with the same direction of  $\text{Log}_2$  fold-change in both  $\text{Log}_2$  fold-change of  $^{12}\text{C}$  compounds in  $^{13}\text{C}$ -HA107 gavaged samples and  $\text{Log}_2$  fold-change of  $^{12}\text{C}$  compounds in  $^{12}\text{C}$ -HA107 gavaged samples were taken. Where shown, the Metamapp program was used to evaluate the Tanimoto chemical similarity index on compounds selectively present in one condition applying Cytoscape software for network visualization. Mann Whitney U test was performed using wilcox.test function in R (\* =  $p < 0.05$ , \*\* =  $p < 0.01$ , \*\*\* =  $p < 0.001$ ).

### Preparation of $^{14}\text{C}$ -labeled bacteria

M9 medium supplemented with 100  $\mu\text{g}/\text{mL}$  meso-DAP, 400  $\mu\text{g}/\text{mL}$  D-alanine, 10  $\mu\text{g}/\text{mL}$  lysine, 10  $\mu\text{g}/\text{mL}$  threonine, 10  $\mu\text{g}/\text{mL}$  methionine, 10  $\mu\text{g}/\text{mL}$  proline, 4  $\mu\text{g}/\text{mL}$  thiamine, 2 mM L-arabinose, and 5 mM succinate was inoculated with  $1/100^{\text{th}}$  amount of *E. coli* HA107 (or JM83) overnight culture grown in LB medium. The culture was incubated with shaking at 180 rpm at  $37^\circ\text{C}$ . When the culture reached  $\text{OD}_{600} 0.28 \pm 0.05$ , 2-[ $1\text{-}^{14}\text{C}$ ]-deoxy-D-glucose (Perkin Elmer) was added. The bacterial culture was further incubated for 12-14 hours at  $37^\circ\text{C}$ . After harvesting the bacterial culture, the bacterial pellet was washed twice with PBS to remove unincorporated  $^{14}\text{C}$ -radioactive materials and resuspended prior to gavage.

### Cecal injection

For cecal injection mice were anaesthetized with isoflurane by inhalation (3.0 to 4.0% v/v isoflurane from a vaporizer with  $\text{O}_2$  flow at 1-2 L/min). An incision ( $\sim 1$  cm) was made with curved scissors at left side of lower abdomen, and the cecum was located.  $^{14}\text{C}$ -labeled HA107 was injected into the middle of cecum and mixed thoroughly with the contents. The abdominal incision was closed with AUTOCLIP Wound Clip System (BD). Temgesic (0.05-0.1  $\mu\text{g}/\text{g}$  body weight) was injected subcutaneously for analgesia.

### Liquid scintillation counting

Weighed samples were incubated with 1 mL of NCS Tissue Solubilizer (GE Healthcare) at  $56^\circ\text{C}$  until completely dissolved. The pH was neutralized with 200  $\mu\text{l}$  of 100% acetic acid. Ultima Gold liquid scintillation cocktail (18 ml, PerkinElmer) was added to each sample. The  $^{14}\text{C}$ -radioactivity in each sample was measured in a TRI-CARB 2300TR Liquid Scintillation Analyzer (Packard). Scintillation background for each fluid or tissue type was subtracted using matched samples from control germ-free mice that had not received  $^{14}\text{C}$ -labeled bacteria.

### RNA isolation

Tissue samples were snap-frozen in TRIzol reagent (Invitrogen) using liquid nitrogen. Thawed tissues in TRIzol reagent were immediately homogenized at 25 Hz for 2 min in a tissue homogenizer (Retsch MM 400) with sterile steel balls (Berani). Total RNA was isolated following the standard protocol from Invitrogen. The total RNA was further purified with RNeasy MinElute kit (QIAGEN). RNA quality was assessed on a Bioanalyzer 2100 (Agilent). Ribosomal RNA was removed with Ribominus Transcriptome Isolation Kit (Invitrogen). RNA libraries were prepared with TruSeq RNA sample preparation v2 kit (TruSeq Stranded mRNA Sample Preparation, Illumina). RNA sequencing was performed with Illumina HiSeq 2500 using the 150bp paired-end mode. Read quality control was with FastQC. Each read was mapped onto the mouse genome using TopHat2. Counts per gene were assessed using HTSeq-count software. Differential gene expression analysis was performed using DESeq2. Adjusted  $\text{Log}_2$  fold-change and adjusted  $p$ -values (corrected for multiple testing) were used to determine significant differences in gene expression. Functional protein association networks of genes of adjusted  $p$ -value of  $< 0.05$  were analyzed using the STRING database (version 10) taking network confidence scores  $\geq 0.4$ .

### Live intestinal endomicroscopy

Mice investigated with endomicroscopy were anaesthetized with isoflurane inhalation as described for cecal injection on a heating pad at  $37^\circ\text{C}$ . The abdomen of the anaesthetized mouse was opened and a Cellvizio confocal miniprobe (Mauna Kea) was inserted into the intestinal ileal lumen. Fluorescein isothiocyanate (FITC)-dextran (0.5 mg, 70 kDa, Sigma) in PBS was injected intravenously to provide real-time vascular contrast. The fluorescence of FITC in the intestinal vasculature was recorded with Cellvizio software (Mauna Kea). Metrics of the endothelial and epithelial layers were evaluated with ImageJ software (NIH).

### Enzyme-linked immunosorbent assay (ELISA)

The gastrointestinal tracts from HA107 conditioned germ-free C57BL/6 mice were separated according to section (duodenum, jejunum, cecum and colon). Isolated luminal contents from each section were weighed. IgA concentration was measured with ELISA using goat anti-mouse IgA (Bio-Rad Antibodies) coating antibody. The detection antibody was HRP-conjugated anti-mouse IgA (Sigma). Standards were myeloma-derived purified IgA (Hycult). The IgA concentration in the contents of each germ-free intestinal segment was plotted.

### Bacterial immunofluorescent staining

*E. coli* HA107 was cultured without shaking at 37°C for overnight. The bacteria were then washed in PBS and resuspended at 10<sup>7</sup> per ml. Portions (50 μl) of the bacterial suspension were dropped onto glass slides and the bacterial drop was encircled using a wax pen. Bacteria were allowed to sediment onto the glass slides and to dry. Transiently flamed bacteria on glass slides were stained with intestinal wash prepared from small intestine of HA107 conditioned germ-free C57BL/6 mice. The IgA antibodies bound to bacteria were visualized with FITC-conjugated anti-mouse IgA (BD Bioscience). DAPI (4', 6-diamidino-2-phenylindole) was used to counter-stain the bacterial DNA. Immunofluorescent pictures were taken using Flash Slide Scanner (PerkinElmer) with 40 magnifications.

### Bacterial motility assay

*E. coli* expressing GFP constitutively were resuspended at 10<sup>8</sup> CFU/mL with PBS-based intestinal wash from either HA107 conditioned C57BL/6 or *Igh-J*<sup>-/-</sup> mice. Bacteria were then loaded to microfluid chips. Serial pictures were taken every second over 5 min by Zeiss LSM 700 confocal microscope. The images were transformed into time-lapse videos with Volocity software (PerkinElmer).

### Bacterial intestinal transit time

Germ-free C57BL/6 and *Igh-J*<sup>-/-</sup> mice were conditioned with HA107 as described previously. For small intestinal transit, 10<sup>7</sup> CFU of HA107 were introduced directly into the stomachs of mice. Two hours after the intragastric gavage, small intestines were collected and separated into 10 sections of identical length from duodenum to ileum. All luminal contents in each section were plated on LB agar plates with the auxotrophic supplements and results were evaluated for each segment. To measure whole intestinal transit time, 10<sup>10</sup> CFU of HA107 were introduced to the stomachs of mice. Feces were sequentially collected and cultured as described previously.

### Metabolite-specific ELISA

Metabolite-specific ELISA was performed to address the binding of intestinal IgA to purified identified metabolites including pentadecanoic acid (Sigma); 5-methoxytryptamine (Sigma); N-acetylaspartylglutamic acid (Sigma); scopolamine hydrochloride (Sigma); D-maltose (VWR) and heptadecanoic acid (Sigma). *E. coli* LPS (Sigma) and DNA from *E. coli* were used as controls. ELISA plates (Millian) were coated with 50 μl/well of 10 μg/mL antigen overnight (ON) using coating buffer (0.1M NaHCO<sub>3</sub>) except pentadecanoic acid and heptadecanoic acid coated using 100% ethanol. After blocking (PBS with 2% BSA, RT, 2h), serial diluted intestinal washes containing IgA were added to the plates and incubated for 2 hours. To reveal the IgA binding affinity to metabolites, HRP conjugated anti-IgA antibody (1:100, Sigma) was added to each well and incubated for 45 min. Plates were then washed (4X, PBS containing 0.5% Tween-20) and developing reagent (100 μL per well, 1mg ABTS plus 5 μl H<sub>2</sub>O<sub>2</sub>/10ml 0.1 M NaH<sub>2</sub>PO<sub>4</sub>) was added. Samples then were read at OD<sub>415</sub> using an ELISA plate reader.

### Cytokine release assays

Mice used in cytokine release assays were preconditioned with HA107 as described in Method Preconditioning. Peritoneal cells were collected by gentle flushing of the peritoneal cavity with RPMI 1640 medium; splenocytes, mesenteric lymph node cells (MLN cells) and bone marrow cells harvested from mouse femur were isolated using a 100 μm cell strainer. After red blood cell lysis, 2 × 10<sup>6</sup> cells/mL were prepared in complete medium (RPMI 1640 with 10% FBS, 50 μM β-mercaptoethanol, 100 U/mL penicillin/streptomycin and 2mM HEPES). A 100 μl suspension was seeded in each well of 96-well cell culture plates (Thermo Fisher). The natural cytokine release from cells was determined after incubating at 37°C supplemented with 5% CO<sub>2</sub> for 2 hours. For *in vitro* stimulation with metabolites/bacteria-derived components, 250 μg/mL of each compound as listed was added to the culture and incubation was carried out for 6 hours. The culture supernatants were collected for further analysis.

### Intraperitoneal challenge with pentadecanoic acid or 5-methoxytryptamine

Mice were preconditioned with HA107 or left untreated. Two weeks after the last oral bacterial priming, mice were intraperitoneally injected with 1mg/kg body weight pentadecanoic acid or 5-methoxytryptamine. 6 hours after injection, cells were isolated from indicated lymphoid organs and cultured for 2 hours. The supernatants were collected for further analysis.

### Cytokine quantification

Cytokine measurements were performed using the Meso Scale Discovery (MSD) system. Samples were initially diluted 1:1 with commercial MSD diluent buffer and added into Meso Scale 19-plex plates. Serial titrations of cytokine standards were also added to the plates. After overnight incubation, plates were washed (3X, PBS with 0.5% Tween-20) and a panel of commercial 19 secondary

antibodies was added to plates and incubated for 2 hours following the manufacturer's protocol and instructions. Plates were then washed (3X, PBS containing 0.5% Tween-20), and 150 $\mu$ l substrate buffer was added into each well. Plates were then read on Meso Scale plate reader.

### QUANTIFICATION AND STATISTICAL ANALYSIS

Statistical parameters including the definitions and exact values of n (e.g., number of experiments, number of mice, etc) and distributions are reported in the Figure Legends. Mann-Whitney U test was used for all metabolomic comparisons and unpaired student-t test was performed in intestinal transit tests and microbial culture related tests. Statistical analysis was performed in GraphPad Prism and R software. In all figures: \* =  $p < 0.05$ , \*\* =  $p < 0.01$ , \*\*\* =  $p < 0.001$ .

### DATA AND SOFTWARE AVAILABILITY

The RNA sequencing data files have been deposited in the NCBI Gene Expression Omnibus under accession number GEO:GSE102543. String analysis (<https://string-db.org/>) has been used to elucidate the RNA sequencing data. All original metabolomic data are available at <http://www.mucosalimmunology.ch/de/The-lab-University-of-Bern/Supplementary-resources-of-Publications>.

**Immunity, Volume 49**

**Supplemental Information**

**Antibodies Set Boundaries Limiting**

**Microbial Metabolite Penetration**

**and the Resultant Mammalian Host Response**

**Yasuhiro Uchimura, Tobias Fuhrer, Hai Li, Melissa A. Lawson, Michael Zimmermann, Bahtiyar Yilmaz, Joel Zindel, Francesca Ronchi, Marcel Sorribas, Siegfried Hapfelmeier, Stephanie C. Ganal-Vonarburg, Mercedes Gomez de Agüero, Kathy D. McCoy, Uwe Sauer, and Andrew J. Macpherson**

**A**

i) Stable isotope tracing in germ-free mice

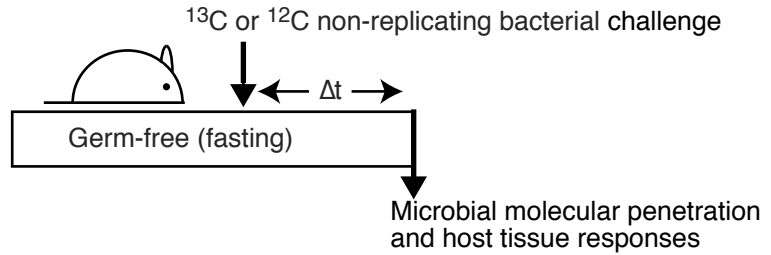

ii) Stable isotope tracing after preconditioning to mature intestinal barrier mechanisms

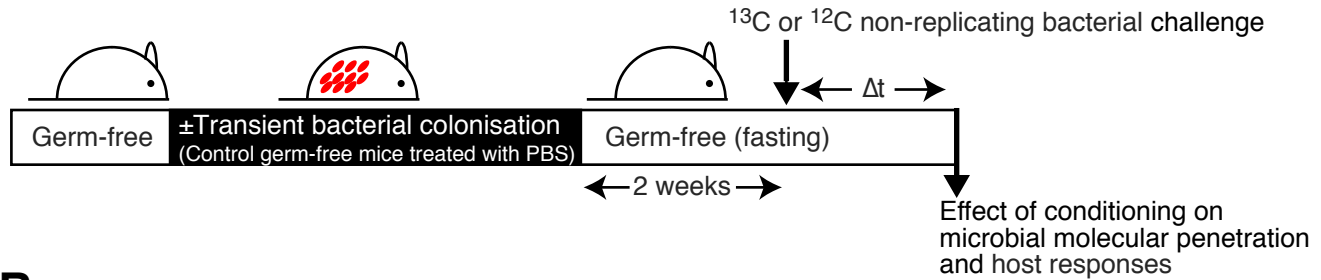**B**Bacterial derived  $\text{C}_4$  compound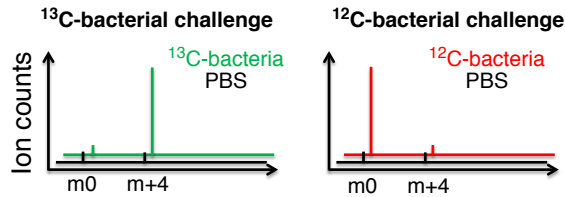Higher ion count at  $m+4$  annotation in  $^{13}\text{C}$ -bacterial challenged mice compared with PBS challenged background.**C**Host response of endogenous  $\text{C}_4$  compound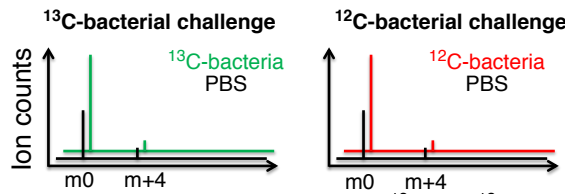Higher ion counts at  $m_0$  annotation in both  $^{13}\text{C}$ - and  $^{12}\text{C}$ -bacterial challenged mice compared with PBS challenged background.**D**

Labelling of amino acids

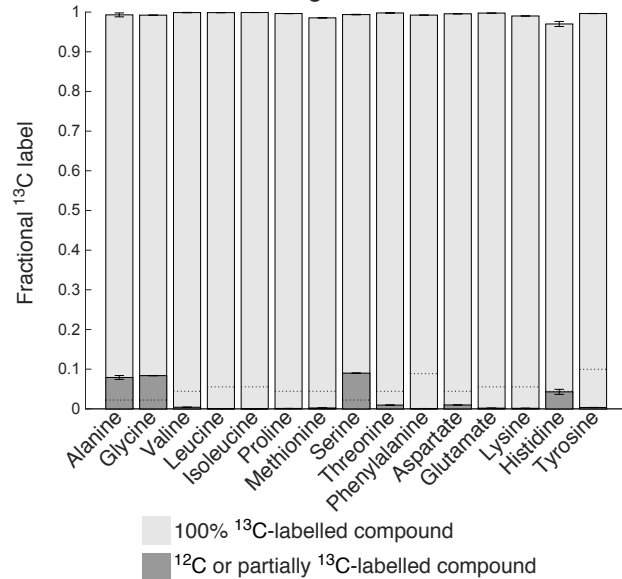**E**

Labelling of bacterial metabolites

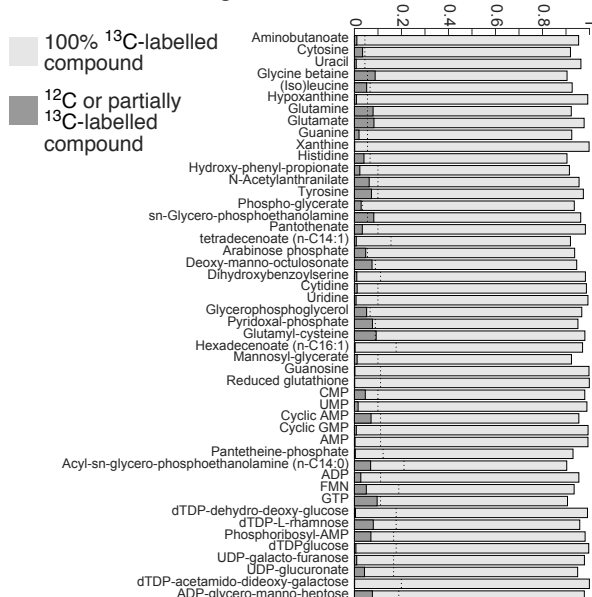**F**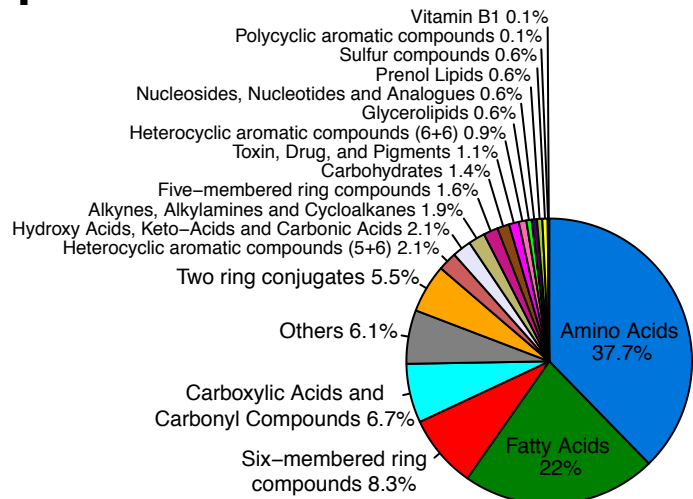

**Uchimura et al., Figure S1**  
(color figure, related to Figure 1)

---

**Figure S1. Stable isotope tracing design for concurrent measurement of penetration of microbial metabolites and the host response (related to Figure 1).**

- (A)** i) The schematic representation shows the experimental design of germ-free control mice challenged with  $^{13}\text{C}$  or  $^{12}\text{C}$  non-replicating bacteria and subsequent sequential sampling.  
ii) The extended schematic representation shows the experimental design using mice that were preconditioned with transitory bacterial colonization in order to mature immune and non-immune consolidated intestinal barrier functions and comparison with non-conditioned controls. Two weeks later they received  $^{13}\text{C}$  or  $^{12}\text{C}$  non-replicating bacterial challenge or control PBS gavage with subsequent sequential sampling to determine  $^{13}\text{C}$  bacterial metabolite penetration into the host and the  $^{12}\text{C}$  host response.
- (B)** A schematic representation of the mass spectrometric readout of a hypothetical bacterial-derived  $^{13}\text{C}_4$  compound in the analysis of fluids or tissues in panel A.
- (C)** A schematic representation of the mass spectrometric readout of a hypothetical host-derived  $^{12}\text{C}_4$  compound in the analysis of fluids or tissues in panel A.
- (D)** Fractional  $^{13}\text{C}$ -labelling of amino acids of the  $^{13}\text{C}$  non-replicating bacterial gavage cocktail (*E. coli* HA107) was analyzed with gas chromatography-mass spectrometry (GC-MS).
- (E)** as in (D), but showing the fractional  $^{13}\text{C}$ -labelling of a range of compound classes obtained from a 6550 Agilent Q-TOF mass spectrometer with non-targeted flow injection.
- (F)** Piechart showing relative representation of different microbial compound classes with  $\geq 2$ -fold increased metabolites and  $\geq 75\%$   $^{13}\text{C}$ -labeling at 2-hours and 18-hours after  $^{13}\text{C}$ -HA107 gavage in fluid samples corresponding to Figure 2A and B.



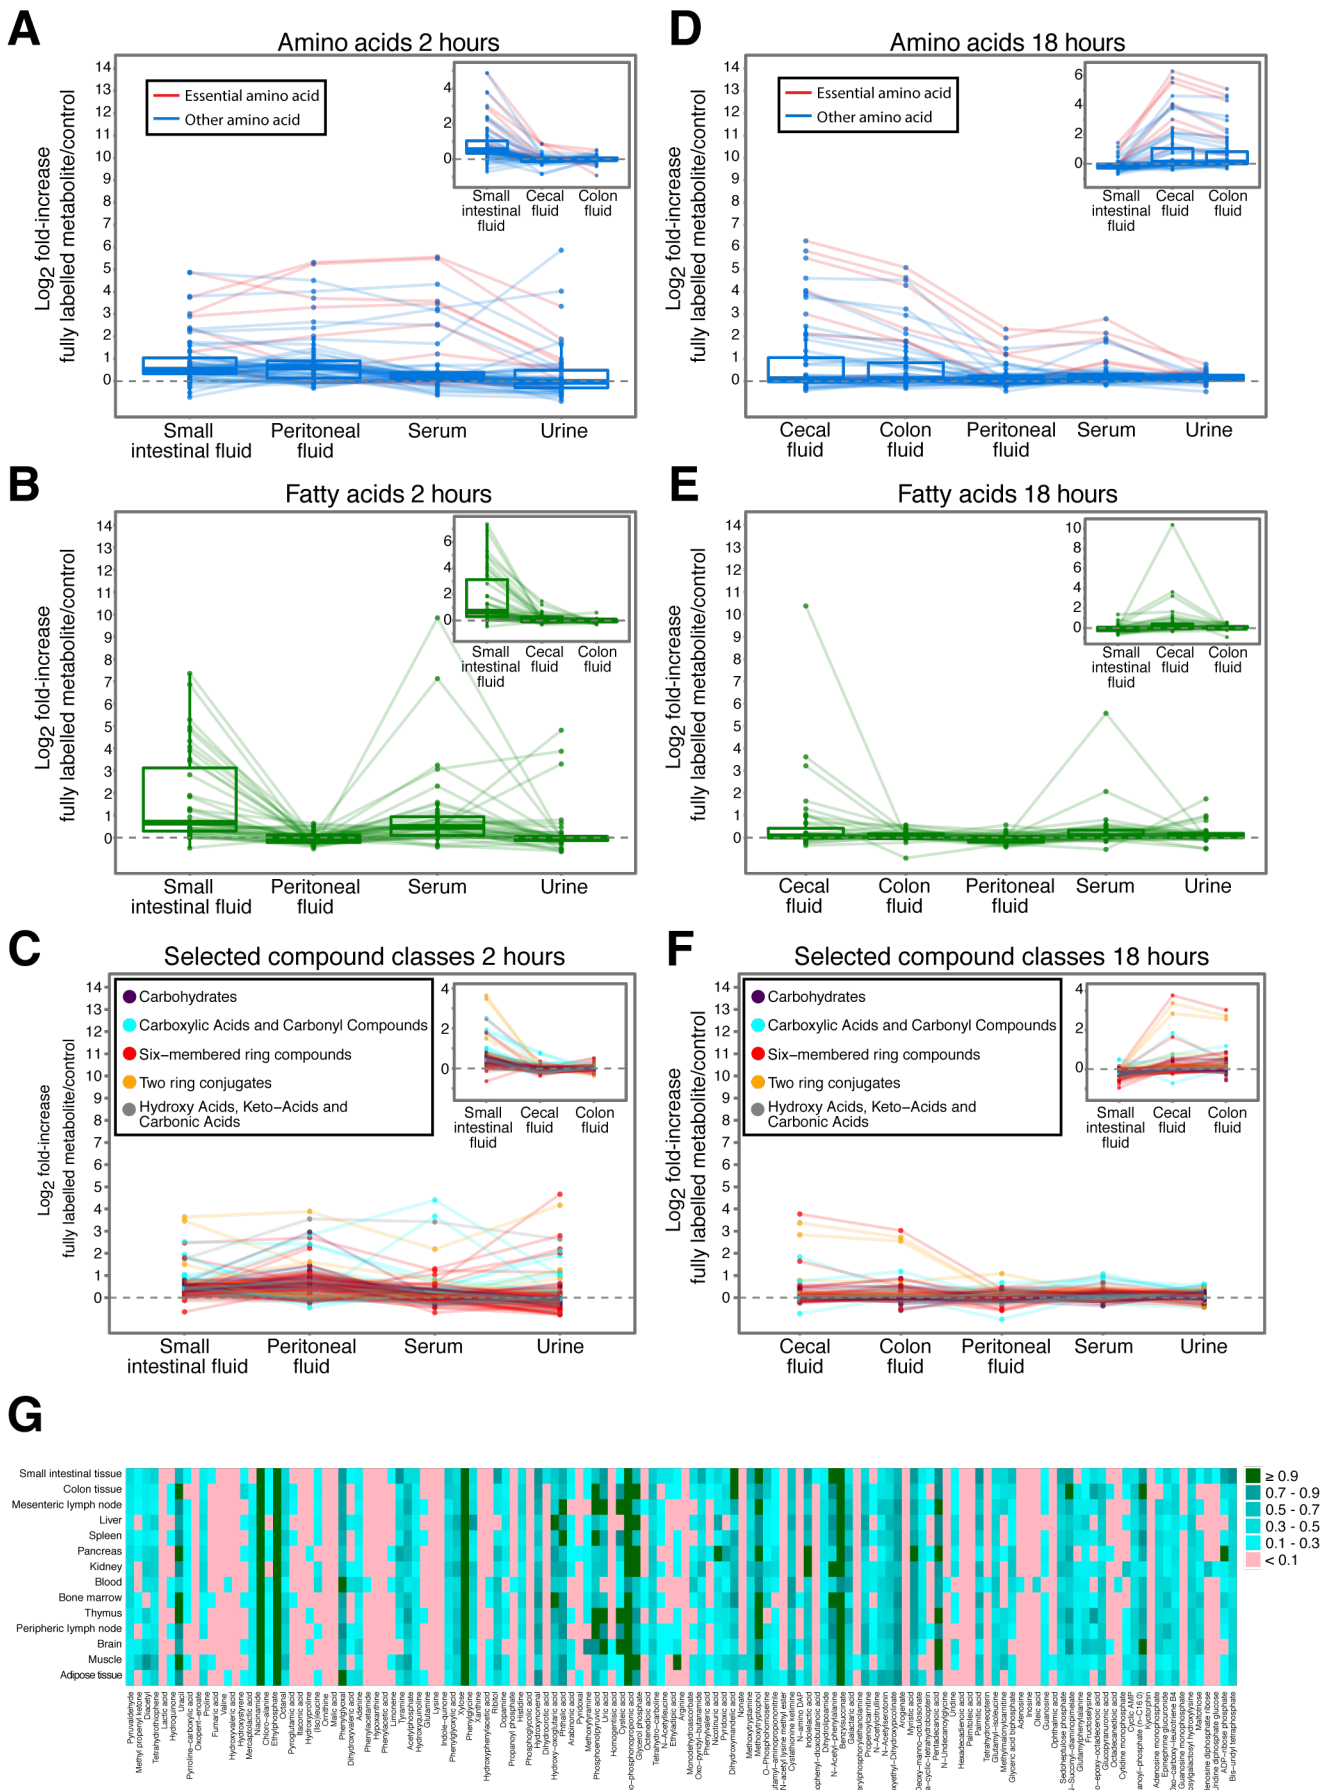

Uchimura et al., Figure S2  
(color figure, related to Figure 2)

---

**Figure S2. Penetration of  $^{13}\text{C}$ -labelled bacterial metabolites from the intestine to systemic sites (related to Figure 2).**

Germ-free C57BL/6 mice were gavaged with  $^{13}\text{C}$ -labelled HA107 or PBS as control (n = 3 - 4 mice per group). Fluid samples were collected 2 or 18 hours later and analyzed with Q-TOF mass spectrometry.

**(A)** The plot shows annotated ions representing metabolites containing  $\geq 75\%$   $^{13}\text{C}$  of the amino acid compound class from small intestinal fluids, peritoneal fluids, serum and urine at 2 hours, with lines connecting identical metabolites. The red coloured lines highlighted essential amino acids from other amino acids (blue). The inset shows intestinal samples from small intestinal fluids, cecal fluids and colon fluids also at 2 hours.

**(B)** As for panel A, but showing the fatty acid compound class at 2 hours.

**(C)** As for panel A, but showing carbohydrates (purple), carboxylic acids and carbonyl compounds (cyan), six-membered ring compounds (red), two ring conjugates (orange), and hydroxy acids, keto-acids and carbonic acids (grey) at 2 hours.

**(D-F)** are as in (A-C) respectively, but showing 18 hour samples.

**(G)** Heatmap indicating fractional labelling degree of bacterial-derived metabolites estimated as relative abundance of the fully (uniformly, U) labelled isoform ( $\text{U-}^{13}\text{C} / (\text{U-}^{13}\text{C} + ^{12}\text{C})$ ),  $\geq 90\%$ ; dark green 10-90% pale to dark cyan and potentially exclusively host-originated metabolites  $< 10\%$  light red, in different host samples at 2 hours.

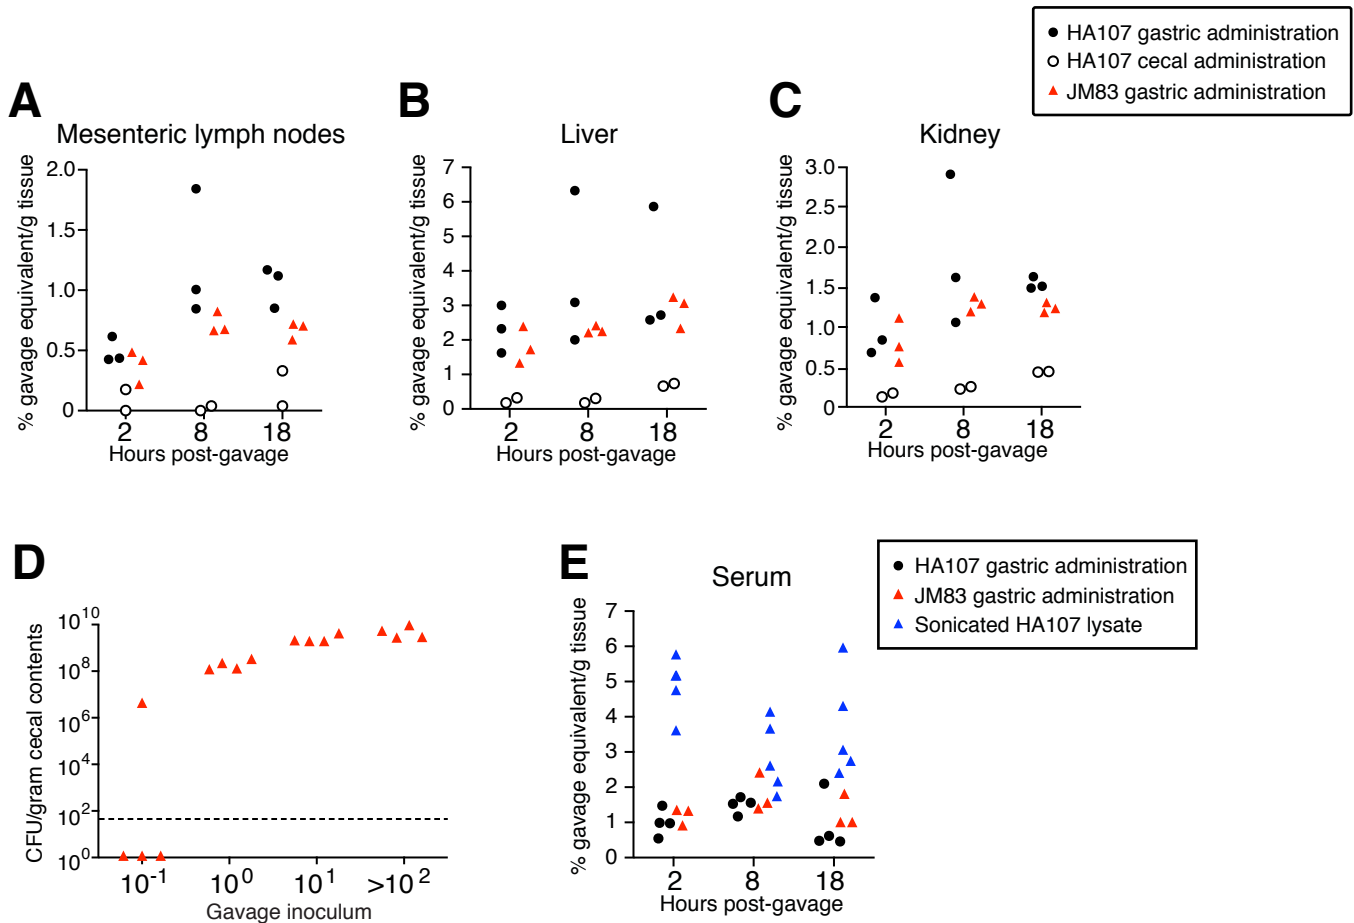

**Figure S3. Penetration of bacterial products into systemic sites after treatment with *E.coli* HA107 or its replication-competent parent strain and determination of sensitivity of colonisation without significant gastric microbial killing (related to Figure 3).**

(A-C)  $^{14}\text{C}$ -labelled *E. coli* HA107 (after growth on  $^{14}\text{C}$ -glucose; closed circles) was administered directly into the stomach or mixed directly with the cecal contents (open circles) of germ-free C57BL/6 mice. For comparison,  $^{14}\text{C}$ -labelled *E. coli* JM83 (the replication competent parent strain of HA107; red triangles) was administered into the stomach of a separate group of mice.  $^{14}\text{C}$ -radioactivity in (A) mesenteric lymph nodes, (B) liver and (C) kidney were monitored at 2, 8, and 18 hours after oral gavage or cecal administration. Background radioactivity from the respective solid or liquid samples of control germ-free mice was subtracted and results shown as a percentage of gavage equivalent of the bacterial cocktail used for the oral gavage or cecal administration. The results were pooled from two independent experiments.

(D) Serial dilutions ( $10^{-1}$ ,  $10^0$ ,  $10^1$ , and  $\geq 10^2$  CFU) of *E. coli* JM83 (HA107 parent strain) were orally administered to germ-free C57BL/6 mice. After 18 hours of colonisation, cecal contents was cultured on LB plates, and the total CFU/gram contents were plotted. Each point represents one mouse.

(E) Live  $^{14}\text{C}$ -labelled HA107, live  $^{14}\text{C}$ -labelled JM83 and sonication-generated  $^{14}\text{C}$ -labelled *E. coli* HA107 lysis were gavaged to germ-free C57BL/6 mice. Serum samples were collected from mice at 2, 8 and 18 hours post gavage. Radioactivity of serum samples were analyzed as in Figure 3A.

**A** IgA concentration in the intestine of conditioned germ-free C57BL/6 mice

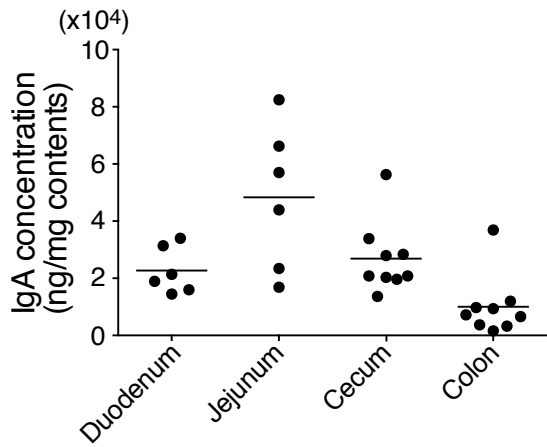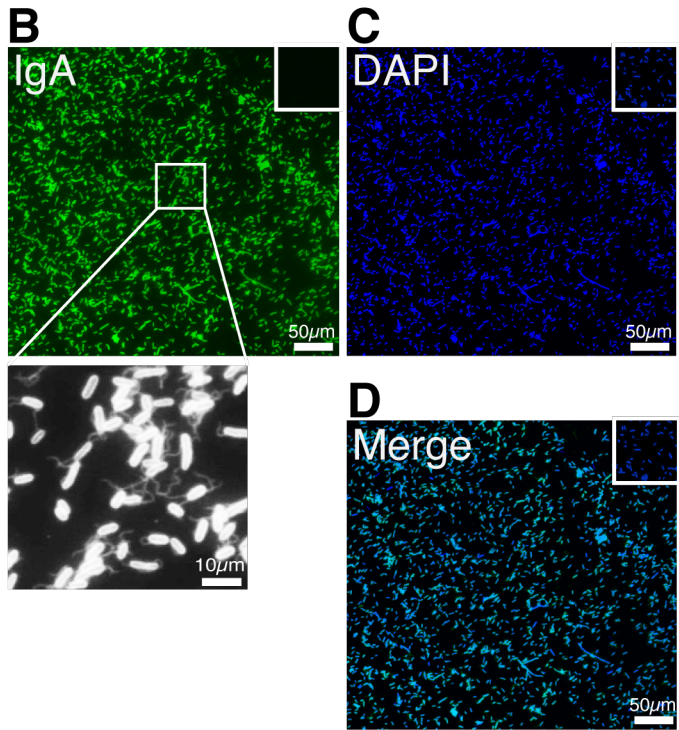

**E**

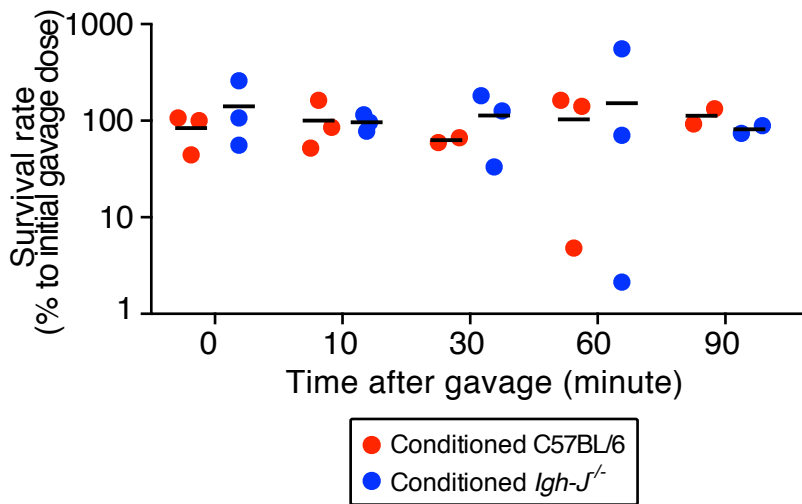

**F**

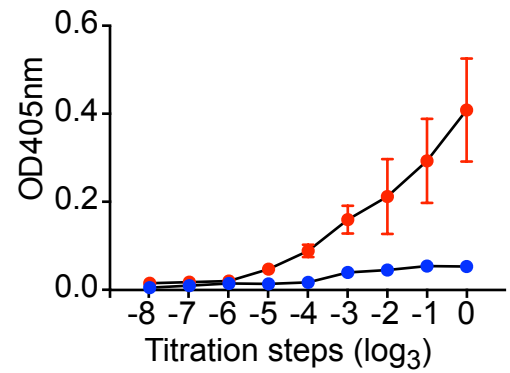

**G**

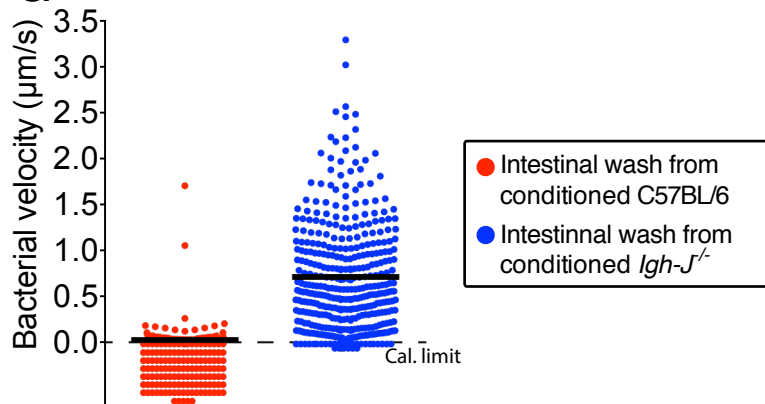

**H**

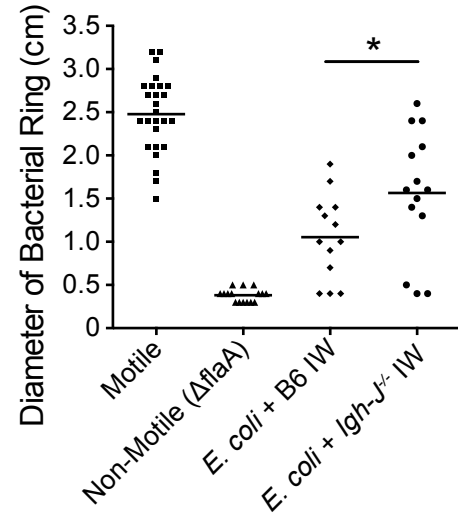

---

**Figure S4. Intestinal conditioning with transient HA107 colonisation generates a bacterial-specific secretory IgA response in the small intestine of germ-free mice with reduced bacterial motility (related to Figure 4).**

**(A)** IgA concentration in intestinal contents obtained from HA107 preconditioned germ-free C57BL/6 mice.

Two weeks after the last HA107 gavage, intestinal contents from each indicated gut sections were collected and IgA levels were measured by ELISA. Each dot indicates the value obtained from an individual mouse.

**(B-D)** *E. coli* HA107 was incubated with native intestinal wash fluid collected from HA107 preconditioned germ-free C57BL/6 mice. The IgA antibodies bound to HA107 were visualized with FITC-conjugated anti-mouse IgA antibody (B). Bacterial DNA was stained with DAPI (C). The merged image is shown in (D). The upper right insets show negative controls without intestinal wash fluid. One Area in panel B was enlarged to highlight the flagella coated by IgA. Flash Slide Scanner images are shown using x40 magnification.

**(E)** The survival of HA107 was determined over time in small intestinal blind-loops. Surgically created small bowel loops of HA107 conditioned or untreated germ-free C57BL/6 or *Igh-J*<sup>-/-</sup> mice were injected with 500  $\mu$ l of  $10^{10}$  HA107. At indicated time points, samples were collected and plated to calculate the bacterial survival.

**(F)** Antigen specific ELISA was used to determine the direct binding of IgA to purified flagellin. Intestinal fluid prepared from either HA107 conditioned C57BL/6 or conditioned *Igh-J*<sup>-/-</sup> mice was used as primary antibody. Data shown are mean $\pm$ SD, n = 4.

**(G and H)** *E. coli* was incubated with freshly prepared intestinal washes from either HA107-conditioned C57BL/6 or *Igh-J*<sup>-/-</sup> mice. The motility of GFP labelled bacteria were tracked by Zeiss LSM 700 confocal microscopy (supplementary videos 1 and 2). Bacterial velocities were quantified using Volocity software to semi-automatedly track bacterial motility (G). Bacteria were seeded on semi-solid motility agar after incubation with intestinal fluid as in G, and diameters of bacterial rings were measured after incubation at 37°C for overnight (H).

**Uchimura et al., Figure S4  
(color figure, related to Figure 4)**

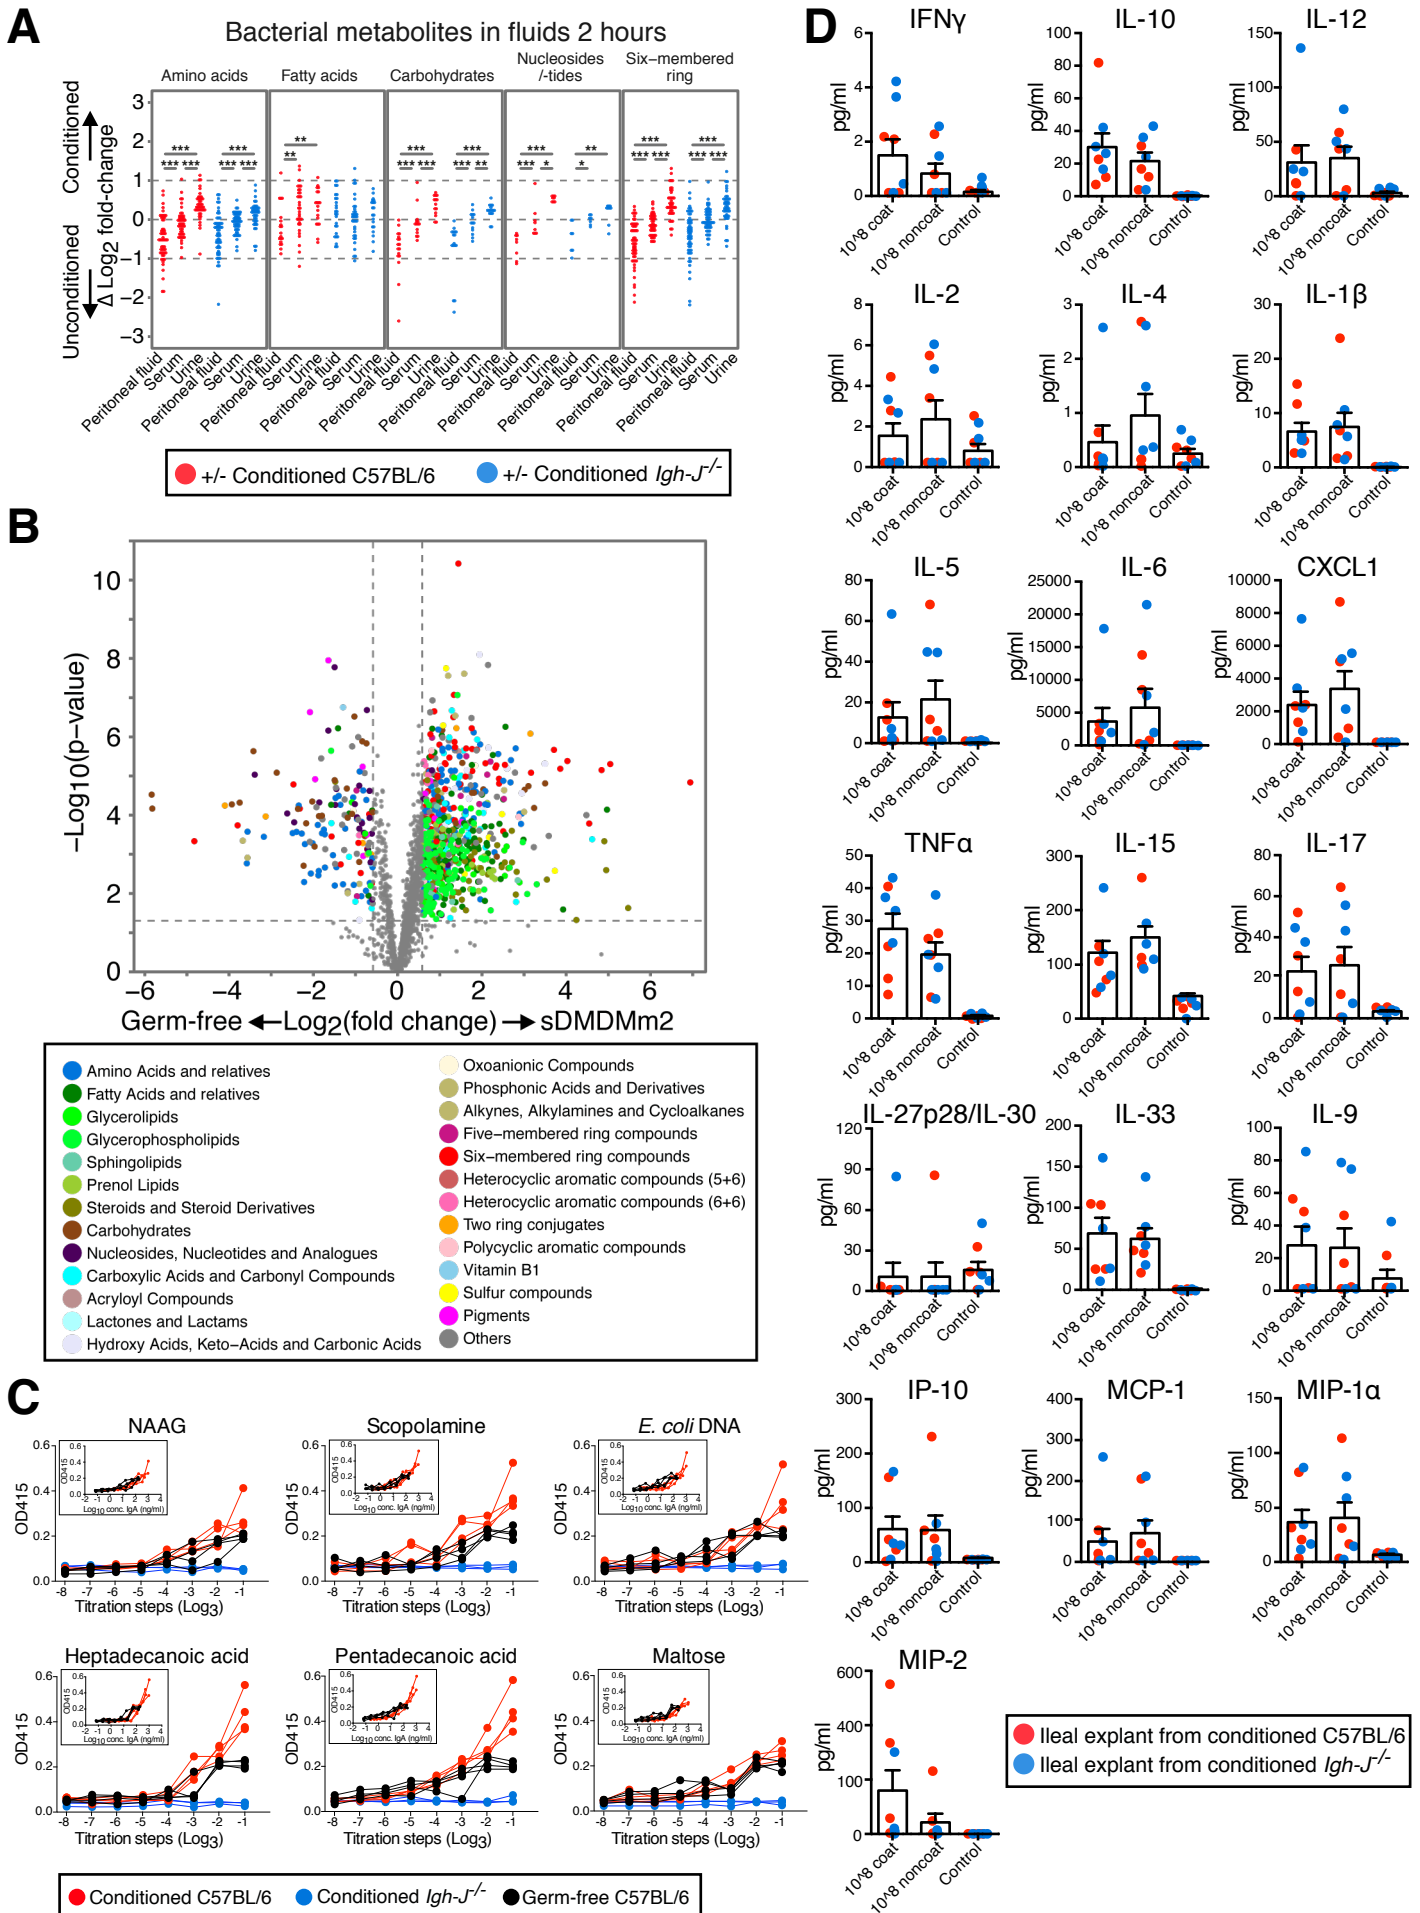

Uchimura et al., Figure S5  
(color figure, related to Figure 5)

---

**Figure S5. Migration of microbial metabolites of specific compound classes from intestinal and systemic tissues after intestinal challenge in germ-free conditioned or unconditioned mice at 2 hours and demonstration of the steady-state lipid load in germ-free and permanently colonised mice (related to Figure 5).**

Germ-free C57BL/6 mice (red symbols) or antibody-deficient *Igh-J<sup>-/-</sup>* mice (blue) were preconditioned with HA107 or control-treated, returning to germ-free status twelve days prior to re-challenge with a gastric dose of fully <sup>13</sup>C-labelled HA107 or PBS as described in the legend to Figure 4.

**(A)** Penetration of different compound classes in host fluids at 2 hours (peritoneal fluid, serum and urine) are shown. Mann-Whitney U test was used and \*\* =  $p < 0.01$ ; \*\*\* =  $p < 0.001$ .

**(B)** Cecal fluid was collected from sDMDMm2 C57BL/6 (n=6) mice colonised with a standardised microbiota of 12 organisms (Brugiroux et al., 2016) and control germ-free C57BL/6 mice (n=6).

Metabolites above 1.5 fold-difference between sDMDMm2 colonized and germ-free control, p value < 0.05 were color-coded.

**(C)** The binding of intestinal IgA to bacterial derived metabolites was determined by antigen-specific ELISA. Intestinal IgA were collected from HA107 preconditioned C57BL/6 mice (red symbols), antibody-deficient *Igh-J<sup>-/-</sup>* mice (blue) or untreated germ-free C57BL/6 mice (black). Insets show results normalised for intestinal IgA concentrations after different treatments.

**(D)** Ileal explants (0.1 cm<sup>2</sup>) collected from HA107 preconditioned germ-free C57BL/6 mice (red symbols) or preconditioned antibody-deficient *Igh-J<sup>-/-</sup>* mice (blue) were seeded in 96-well cell culture plates. 10<sup>8</sup>/ml IgA-coated or -uncoated HA107 were used to trigger the explants for 6 hours. Culture supernatants from ileal explants were harvested to address cytokine release using MSD cytokine 19-plex plates. Bar plots (mean±SD) show the pooled data of C57BL/6 and *Igh-J<sup>-/-</sup>* for each condition.

**Uchimura et al., Figure S5  
(color figure, related to Figure 5)**

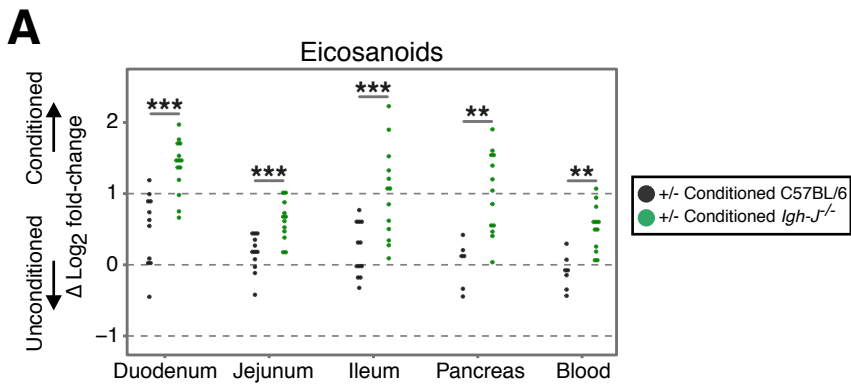

**B** Host metabolite response decreased in conditioned *Igh-J*<sup>-/-</sup> spleen 18 hours

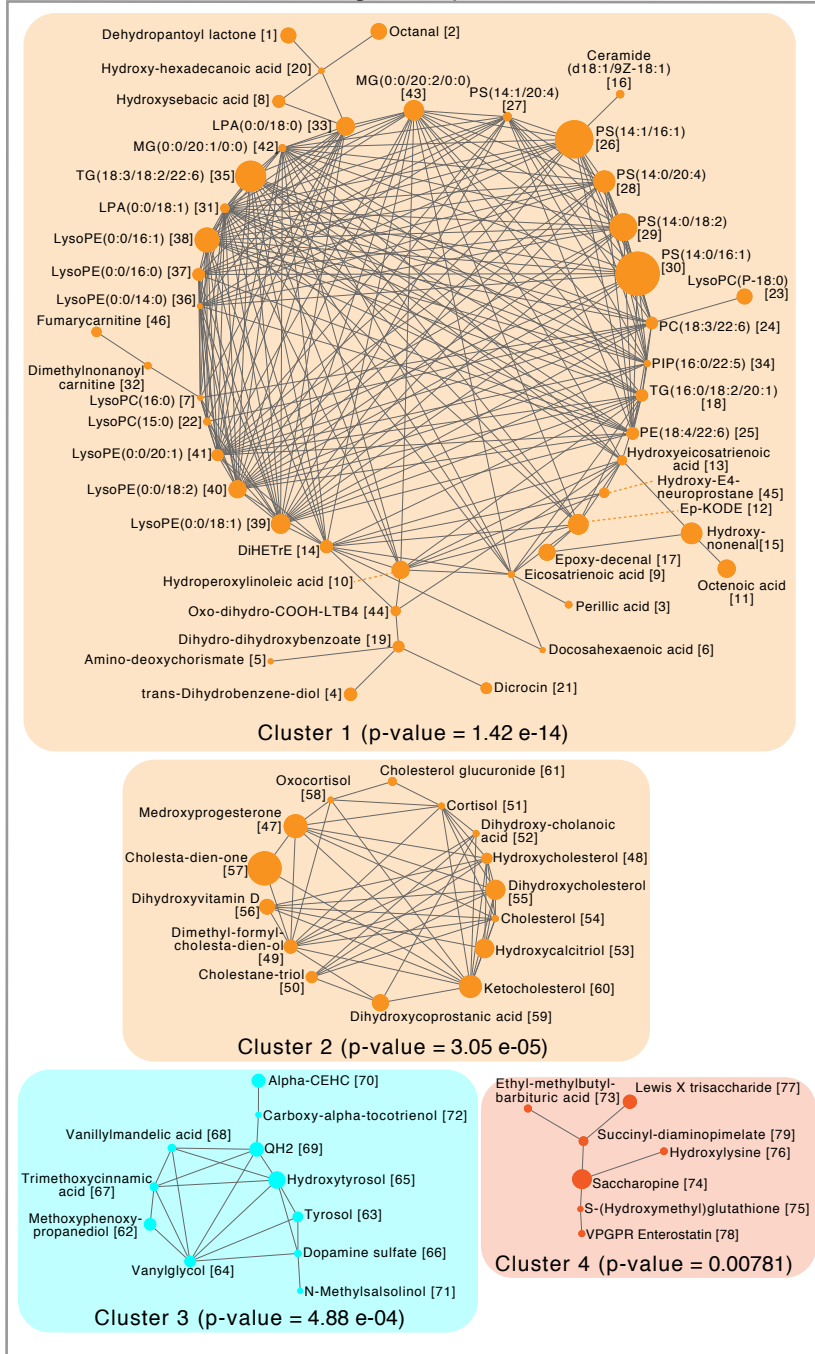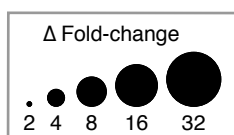

Numbers in squared brackets refer to the metabolite annotation (TableS3).

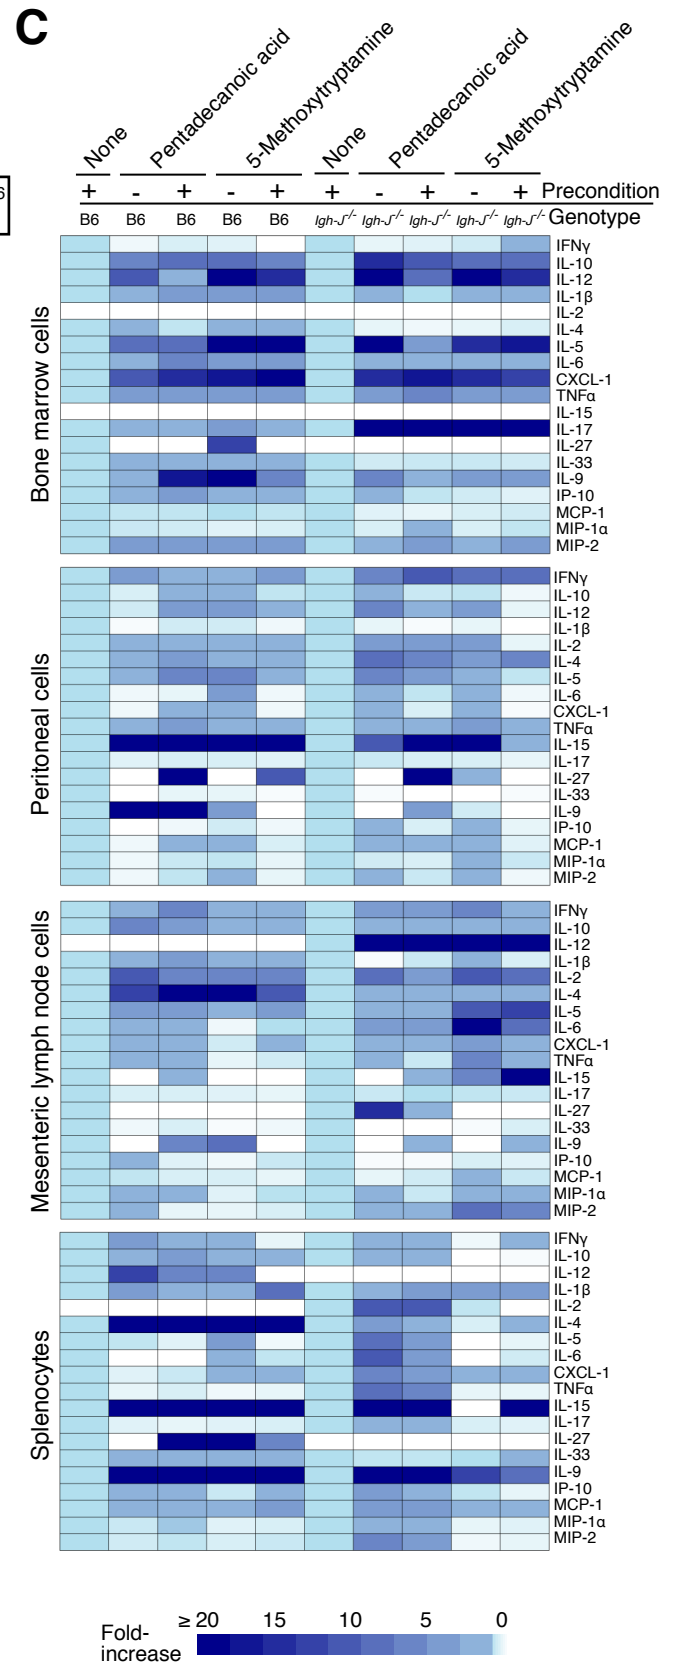

Uchimura et al., Figure S6  
(related to Figures 6 and 7)



---

**Figure S6. Host intestinal and systemic eicosanoid responses following bacterial challenge in conditioned and unconditioned wild-type and antibody-deficient mice. Tissue-specific host metabolite responses in spleen following intestinal bacterial challenge in antibody-deficient mice (related to Figures 6 and 7).**

**(A)** Germ-free C57BL/6 mice (black circles) or antibody-deficient *Igh-J<sup>-/-</sup>* mice (green circles) were preconditioned with HA107 or control-treated, returning to germ-free status two weeks prior to re-challenge with a gastric dose of fully <sup>13</sup>C-labelled or <sup>12</sup>C HA107. Tissue samples were collected after 18 hour HA107 oral-gavage and analyzed with Q-TOF mass spectrometry. Annotated ions representing eicosanoid metabolites containing concordant changes of metabolites from <sup>13</sup>C and <sup>12</sup>C pulsed mice, without mass shift of the annotated ions were plotted. Log<sub>2</sub>-fold change differences between conditioned and unconditioned mice for each metabolite are shown for the duodenum, jejunum, ileum, pancreas and blood 18 hours after HA107 gavage.

**(B)** Increased <sup>12</sup>C-annotated host metabolites in conditioned *Igh-J<sup>-/-</sup>* spleen 18 hours after challenge were applied to MetaMapp to obtain chemical similarity networks (Tanimoto chemical similarity ≥ 0.7). The size of nodes is proportional to absolute value of the Δ fold-change. Mann Whitney U test (paired) was used to calculate the p value.

**(C)** Germ-free C57BL/6 mice or antibody-deficient *Igh-J<sup>-/-</sup>* mice were preconditioned with HA107 or left untreated. After two weeks, mice were either re-challenged with pentadecanoic acid or 5-methoxytryptamine. The cytokines released by cells from different lymphoid tissues were measured as described in the legend to Figure 6D. Results show the mean of all data of each group compared with unchallenged controls with same genetic background (C57BL/6 or *Igh-J<sup>-/-</sup>*) n = 4 mice of each group.

**Uchimura et al., Figure S6  
(related to Figures 6 and 7)**

**A** Host metabolite response increased in conditioned *Igh-J<sup>-/-</sup>* muscle 18 hours

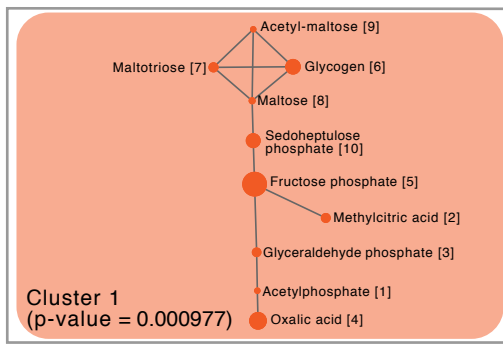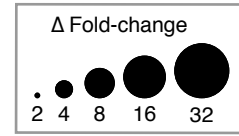

Numbers in squared brackets refer to the metabolite annotation (TableS3).

**B** Host metabolite response decreased in conditioned *Igh-J<sup>-/-</sup>* muscle 18 hours

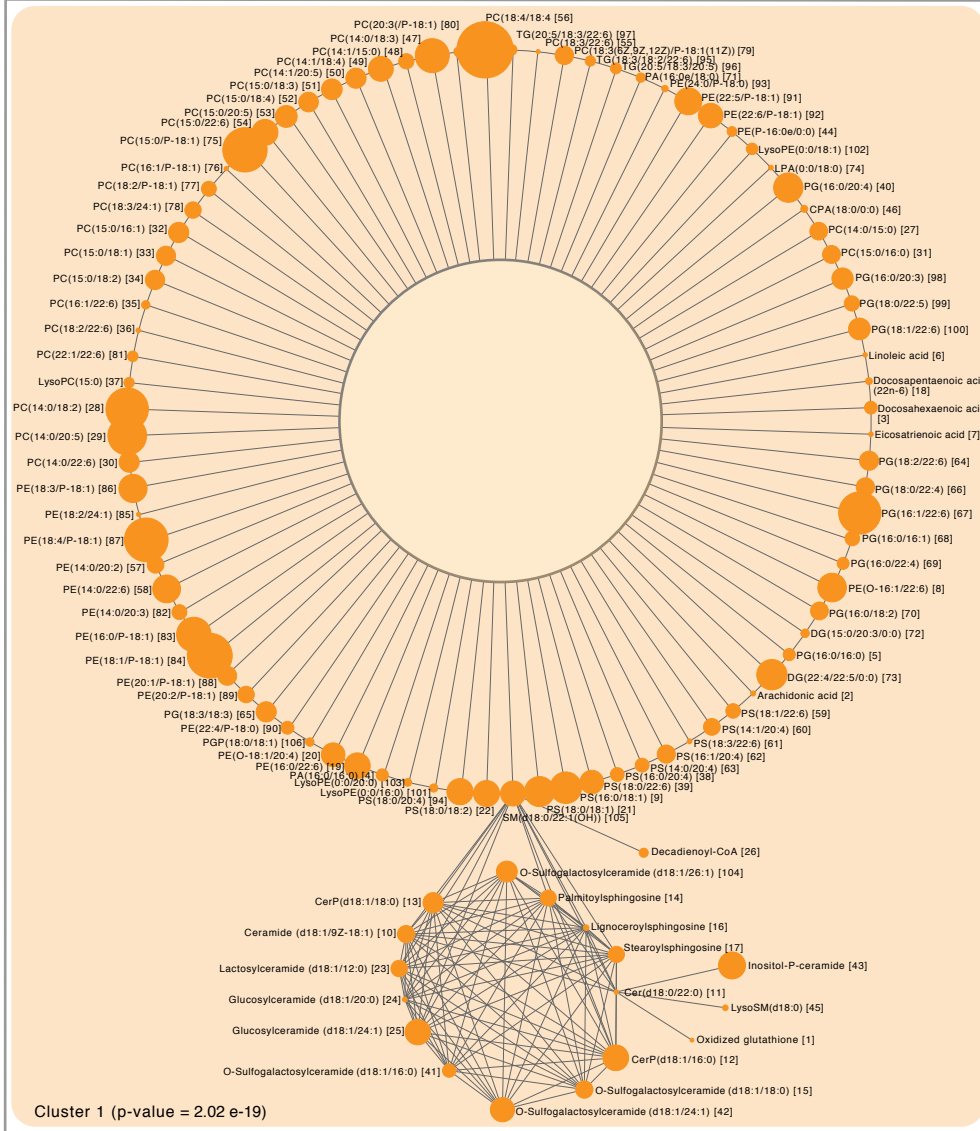

**C** Host metabolite response increased in conditioned *Igh-J<sup>-/-</sup>* adipose tissue 18 hours

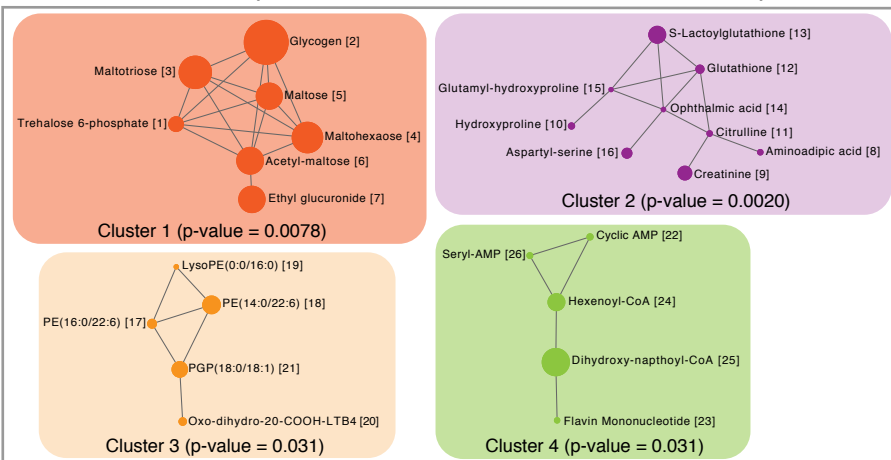

---

**Figure S7. Tissue-specific host metabolite responses in muscle and adipose tissue following intestinal bacterial challenge in antibody-deficient mice (related to Figures 6 and 7).**

Chemical similarity index networks of metabolites increased in skeletal muscle (**A**), decreased in skeletal muscle (**B**) and increased in adipose tissue (**C**) in antibody-deficient mice 18 hours after challenge as described in the legend to Figure S6B.
